1 **Impact of transposable elements on the genome of the urban malaria vector *Anopheles***  
2 ***coluzzii***

3 Carlos Vargas-Chavez<sup>1</sup>, Neil Michel Longo Pendency<sup>2,3</sup>, Sandrine E. Nsango<sup>4</sup>, Laura Aguilera<sup>1</sup>,

4 Diego Ayala<sup>2,5\*</sup>, Josefa González<sup>1\*</sup>

5 <sup>1</sup>Institute of Evolutionary Biology (CSIC-Universitat Pompeu Fabra), Barcelona, Spain.

6 <sup>2</sup>CIRMF, Franceville, Gabon.

7 <sup>3</sup>Ecole doctorale en infectiologie tropicale (EDR), Franceville, Gabon.

8 <sup>4</sup> Faculté de Médecine et des Sciences Pharmaceutiques, Université de Douala,

9 BP 2701, Douala, Cameroun

10 <sup>5</sup>MIVEGEC, Univ Montpellier, CNRS, IRD, Montpellier, France

11 Emails: [carlos.vargas@ibe.upf-csic.es](mailto:carlos.vargas@ibe.upf-csic.es), [longo2michel@gmail.com](mailto:longo2michel@gmail.com), [nsango2013@yahoo.fr](mailto:nsango2013@yahoo.fr),

12 [mlaura.aguilera@gmail.com](mailto:mlaura.aguilera@gmail.com), [diego.ayala@ird.fr](mailto:diego.ayala@ird.fr), [josefa.gonzalez@csic.es](mailto:josefa.gonzalez@csic.es)

13 \*Corresponding authors

14

15

16

17

18

19

20

21

22

23

24

## 25 **ABSTRACT**

26

### 27 **Background**

28 *Anopheles coluzzii* is one of the primary vectors of human malaria in sub-Saharan Africa.

29 Recently, it has colonized the main cities of Central Africa threatening vector control programs.

30 The adaptation of *An. coluzzii* to urban environments is partly due to an increased tolerance to  
31 organic pollution and insecticides. While some of the molecular mechanisms for ecological  
32 adaptation, including chromosome rearrangements and introgressions, are known, the role of  
33 transposable elements (TEs) in the adaptive processes of this species has not been studied yet.

34

### 35 **Results**

36 To better understand the role of TEs in rapid urban adaptation, we sequenced using long-reads  
37 six *An. coluzzii* genomes from natural breeding sites in two major Central Africa cities. We *de*  
38 *novo* annotated the complete set of TEs and identified 64 previously undescribed families. TEs  
39 were non-randomly distributed throughout the genome with significant differences in the number  
40 of insertions of several superfamilies across the studied genomes. We identified seven putatively  
41 active families with insertions near genes with functions related to vectorial capacity. Moreover,  
42 we identified several TE insertions providing promoter and transcription factor binding sites to  
43 insecticide resistance and immune-related genes.

44

### 45 **Conclusions**

46 The analysis of multiple genomes sequenced using long-read technologies allowed us to generate  
47 the most comprehensive TE annotations in this species to date. We found that TEs have an  
48 impact in both the genome architecture and the regulation of functionally relevant genes in *An.*  
49 *coluzzii*. These results provide a basis for future studies of the impact of TEs on the biology of  
50 *An. coluzzii*.

51

## 52 **KEYWORDS**

53 Long-read sequencing, Insecticide resistance, Innate immunity, Comparative genomics,  
54 Chromosome inversions

55

## 56 **BACKGROUND**

57

58 The deadly success of the malaria mosquito *Anopheles coluzzii* is rooted in its extraordinary  
59 ecological plasticity, inhabiting virtually every habitat in West and Central Africa where it  
60 spreads the human malaria parasite (1, 2). Noteworthy, the larvae of *An. coluzzii* exploit more  
61 disturbed and anthropogenic sites than its sister species *An. gambiae*. *An. coluzzii* exhibits a  
62 higher tolerance to salinity and organic pollution, and as a consequence, is the predominant  
63 species in coastal and urban areas (2-4). However, this mosquito not only has a greater resilience  
64 to ion-rich aquatic environments, but it has also become resistant to DDT and pyrethroid  
65 insecticides used for vector control (5). Actually, insecticide resistant populations of this malaria  
66 mosquito are present across its geographical range, driving *An. coluzzii* evolution across the  
67 continent (6, 7). The adaptive flexibility of this mosquito has been also highlighted by its rapid  
68 competence to expand its range of peak biting times in order to avoid insecticide treated bed-nets

69 (8). This extraordinary adaptative capacity makes this malaria vector a threat for malaria control.

70 Thus, elucidating the natural genetic variants underlying the ecological and the physiological

71 responses to fluctuating environments in this species is key for its control.

72

73 At the molecular level, a variety of genetic mechanisms have been related back to the myriad of

74 adaptation processes present in this mosquito. The most prominent and historically studied

75 examples are chromosomal inversions (9, 10). *An. coluzzii* exhibits a large number of

76 polymorphic chromosomal rearrangements (11, 12). Many of these inversions have been

77 associated to environmental adaptation through environmental clines and/or correlation with

78 specific climatic variables (10, 13), such as the inversion 2La associated with aridity tolerance

79 capacity in adults (14, 15). Other types of rearrangements, such as gene duplications, have been

80 involved in insecticide resistance. For example, the acetylcholinesterase (*Ace-I*) gene has been

81 duplicated, maintaining at least a sensitive and a resistance copy, in order to counteract the

82 fitness cost of the resistant phenotype (16-18). Moreover, a recent genome-wide analysis showed

83 that genes containing copy number variants were enriched for insecticide functions (19). Other

84 examples of gene selection due to anthropogenic activities have been found in genes related with

85 detoxification or immunity, particularly in new colonized urban settings (3, 20-22). These

86 adaptive processes have been repeated across West and Central African populations, reducing

87 the efficacy of vector control measures (6). However, while several of the candidate genes

88 responsible for the adaptive capacity of *An. coluzzii* have been identified, our knowledge of the

89 genetic variants underlying differences in these genes lags behind. In particular, very little is

90 known about natural variation in transposable element (TE) insertions in *An. coluzzii*.

91

92 TEs are key players in multiple adaptive processes across a large variety of species, due to their  
93 capacity to generate a wide variety of mutations and their contribution to a rapid responses to  
94 environmental change (23, 24). TEs can disperse across the genome regulatory sequences such  
95 as promoters, enhancers, insulators, and repressive elements thus affecting nearby gene  
96 expression (25). Additionally, they can also act as substrates for ectopic recombination leading to  
97 structural mutations such as chromosomal rearrangements (26-28). However, TEs are often  
98 ignored when analyzing functional variants in genomes. This is because due to their repetitive  
99 nature, TE insertions are difficult to annotate and reads derived from TEs are often discarded in  
100 genome-wide analyses (Goerner-Potvin and Bourque 2018). Long-read sequencing techniques  
101 are needed to get a comprehensive view of TE variation in genomes, as these technique allow the  
102 annotation of TE insertions in the genome rather than inferring their position (29, 30).

103

104 Although TE insertions have been annotated genome-wide in several anopheline species  
105 including *An. coluzzii*, multiple studies to date have characterized the TE repertoire in a single  
106 genome for each species (31-39). To capture the full extent of TE natural variation and the  
107 potential consequences of TE insertions it is necessary to evaluate multiple genomes in order to  
108 comprehensively assess diversity within a species (40-42). This becomes especially relevant  
109 when attempting to identify recent TE insertions and their effect in the genome structure and  
110 genome function, given that they might be restricted to local populations. So far, our knowledge  
111 of *An. coluzzii* genome variation due to TE insertions is limited to a few well-characterized  
112 families that have been found to vary across genomes (43-47).

113

114 In this work, we sequenced using long-read technologies and assembled the genomes of natural  
115 *An. coluzzii* larvae collected in six natural breeding sites in two major cities in Central Africa:  
116 Douala (Cameroon) and Libreville (Gabon). We performed a *de novo* TE annotation of the six  
117 newly assembled genomes, and we also annotated the previously available *An. coluzzii* genome  
118 from Yaoundé (Cameroon) (48). We identified 64 new anopheline TE families and showed that  
119 the availability of multiple genomes substantially improves the discovery of TE variants. We  
120 further analyzed individual TE insertions that could be acting as enhancers and promoters and  
121 that are located nearby genes with functions relevant for the vectorial capacity of the mosquitoes.

122

## 123 **RESULTS**

124

### 125 **Six new whole-genome assemblies of *An. coluzzii* from two major cities in Central Africa**

126 To explore the TE diversity in *An. coluzzii*, we used long-read sequencing and performed whole  
127 genome assemblies and scaffolding of larvae collected from six natural urban breeding sites:  
128 three from Douala, Cameroon, and three from Libreville, Gabon, Central Africa (Figure 1A, see  
129 Material and Methods). Additionally, we performed a reference-guided scaffolding of the  
130 available *An. coluzzii* reference genome *AcolNI* using the chromosome level assembly *AgamP4*  
131 of *An. gambiae* (48). While the number of scaffolds varied from 5 to 107, with the median being  
132 20, the scaffolds' N50 was similar across the seven genomes (Table 1).

133 We assessed the genomes completeness using BUSCO with the dipteran set of genes (49). We  
134 obtained percentages of complete genes ranging from 94.2% to 96.6% except for the *DLA155B*  
135 sample which had a lower completeness value (89.5%; Table 1). These completeness values for

136 most (5/6) of the samples were similar to those from the *AcolNI* genome assembly which  
137 contained 98.9% complete genes (Table 1; Additional file 1: Table S1).

138

139 **Table 1. Genome assemblies and scaffolds' statistics for the *An. coluzzii* genomes we**  
140 **analyzed..**

| Genome                    | Long reads coverage | Illumina coverage | Assembly size (Mb) | Number of contigs | Number of scaffolds | N50 of scaffolds (kb) | Complete BUSCO genes (%) | TE families identified |
|---------------------------|---------------------|-------------------|--------------------|-------------------|---------------------|-----------------------|--------------------------|------------------------|
| <i>DLA112</i>             | 55X                 | 59X               | 252                | 3917              | 107                 | 54591                 | 96.6                     | 244                    |
| <i>DLA155B</i>            | 28X                 | 19X               | 236                | 2081              | 24                  | 52031                 | 89.5                     | 243                    |
| <i>DLA146</i>             | 28X                 | 42X               | 247                | 2036              | 14                  | 54960                 | 95.1                     | 193                    |
| <i>LBV88</i>              | 31X                 | 41X               | 245                | 2576              | 19                  | 54450                 | 94.5                     | 280                    |
| <i>LBV136</i>             | 34X                 | 130X              | 236                | 2911              | 28                  | 52053                 | 95.2                     | 172                    |
| <i>LBV11<sup>a</sup></i>  | 89X                 | 61X               | 246                | 2608              | 20                  | 53712                 | 94.2                     | 294                    |
| <i>AcolNI<sup>b</sup></i> | ~270X               | -                 | 251                | 205               | 5                   | 53057                 | 98.9                     | 283                    |

141 Three genomes were collected in Douala (DLA) and three in Libreville (LBV). <sup>a</sup> *LBV11* was  
142 sequenced using PacBio technologies, while the other five genomes were sequenced using  
143 Oxford Nanopore Technologies. <sup>b</sup> Genome statistics for *AcolNI*, the high quality *de novo*  
144 genome assembly reported by Kingan *et al.*, (48) are also included.

145

146 **64 new anopheline TE families discovered in *An. coluzzii***

147 To identify the TE families present in each of the genomes, we used the *TEdenovo* pipeline from  
148 the REPET package (50). After several rounds of manual curation, we identified between 172

149 and 294 TE families for each genome (Table 1; Additional file 1: Table S2). Remarkably, while  
150 using a single reference would have only allowed the identification of a median of 244 TE  
151 families, clustering the TE libraries from an increasing number of genomes allowed the  
152 identification of a total of 435 well supported TE families (Figure 1B; see Material and  
153 Methods). Interestingly, 64 of these families (32 DNA, 9 LINEs and 23 LTRs) are described here  
154 for the first time. The majority of the new families (43/64) had partial matches to other known  
155 TEs, thus allowing us to classify them at the superfamily level (Additional file 1: Table S3). The  
156 use of multiple references was especially relevant for identifying these previously undescribed  
157 families given that using a single genome would have only allowed to identify a median of 37  
158 (25-48) novel TE families (Figure 1B).

159 To further characterize these novel families, we estimated the average number of insertions in  
160 the seven *An. coluzzii* genomes, and their distribution and abundance in other species from the  
161 *Anopheles* genus (Figure 2; Additional file 2: Figure S1; Additional file 1: Table S3). To do this,  
162 we first annotated individual TE insertions in the seven *An. coluzzii* genomes using the *TEannot*  
163 pipeline from the REPET package (51). To ensure that our annotation was as complete as  
164 possible, besides the 435 families previously identified using REPET, we also included in our  
165 library 85 TE families from other mosquito species that we found to be present in *An. coluzzii*  
166 (Additional file 1: Table S4; see Material and Methods) (52). The final total of 520 families were  
167 classified into 23 superfamilies and then further grouped into four orders (DNA, LINE, LTR and  
168 SINE; Figure 1C).

169  
170 Copies from all 64 new families were found in all seven *An. coluzzii* genomes, further suggesting  
171 that these are *bona fide* families. Although the majority of families contain full-length copies in



172 at least one of the seven genomes analyzed, truncated copies were the most abundant (Figure 2B;  
173 Additional file 1: Table S3). We identified a median of 72 insertions (ranging from 16 to 1,445)  
174 per family and genome (Figure 2B; Additional file 2: Figure S1B). Two out of the four TRIM  
175 elements identified (*Acol\_LTR\_Ele 4* and *Acol\_LTR\_Ele 6*) are among the most abundant new  
176 families, with more than 150 insertions (Figure 2B). TRIM elements are non-autonomous  
177 retrotransposons flanked by LTRs and lacking coding capacity (Figure 2A). These elements have  
178 not been previously described in anopheline genomes and are still underexplored in insect  
179 genomes in general (53-55). However, they might be important players in insect genome  
180 evolution: in plants there are some examples of TRIM elements showing the capacity to  
181 restructure genomes by acting as target sites for retrotransposon insertions, alter host gene  
182 structure, and transduce host genes (56, 57).

183  
184 We also assessed the phylogenetic distribution of the 64 new TE families in 15 species of the  
185 *Anopheles* genus, including the eight members of the *An. gambiae* complex, two more distantly  
186 related mosquitoes species (*Culex quinquefasciatus*, *Aedes aegypti*) and *Drosophila*  
187 *melanogaster* (Additional file 1: Table S3) (35, 58, 59). We found that the new families were  
188 unevenly distributed among the members of the *Anopheles* genus (Figure 2C and Additional file  
189 2: Figure S1C). Ten families were exclusively found in members of the Pyrethophorus series,  
190 suggesting that these elements emerged after the split of this series from the *Cellia* subgenus.  
191 Moreover, 13 families were also found in at least one of the other three non-anopheline species  
192 (Additional file 2: Figure S1C). The distribution of these 13 families was patchy, with some of  
193 them present only in distantly related species while others were present in members of the  
194 *Anopheles* genus or in members of the Pyrethophorus series. These suggests that some of these

195 families might have been acquired through horizontal transfer events (Additional file 1: Table  
196 S3) (39).

197

### 198 **The *Gypsy* superfamily has the largest copy number differences across genomes**

199 The percentage of the genome represented by TEs across the seven genomes varied between  
200 16.94% and 20.21% (Table 2). We found a positive correlation between TE content and genome  
201 size as has been previously described in *Anopheles* and other species (Pearson's  $r = 0.90$ ,  
202 significance = .007; Additional file 3: Figure S2) (39, 60). As expected due to heterochromatin  
203 being a TE rich region and thus challenging to assemble (61), most of the differences in TE  
204 content across genomes were found in the heterochromatin compartment (Table 2;  $\chi^2$  test for  
205 variance, p-value =  $3.57e-3$ ).

206

207 To assess whether differences in TE content at the family and superfamily level existed among  
208 the seven genomes, we focused on the TE copy number in euchromatic regions. We found  
209 significant differences at the order and superfamily levels ( $\chi^2$  p-value =  $1.07e-21$  and p-value =  
210  $1.69e-14$ , respectively). The largest differences were found in the LTR order: LTRs were more  
211 abundant in the *DLA112* and *LBV88* genomes and less abundant in *AcolNI* (Figure 3A). At the  
212 superfamily level, we found that the largest differences were in the *Gypsy* superfamily, which  
213 belongs to the LTR order. We also observed an enrichment of the *RTE* superfamily in *LBV11*, of  
214 the *CRI* and *Bel-Pao* superfamilies in *DLA112*, and a depletion of the *CRI* superfamily in  
215 *AcolNI* (Figure 3). Therefore, most of the differences in TE content between the evaluated  
216 genomes appear to be in retrotransposon families.

217

218 **Table 2. TE content in the seven genomes analyzed.**

| Genome         | Whole genome   |       |          | Euchromatin |       |          | Heterochromatin |       |          |
|----------------|----------------|-------|----------|-------------|-------|----------|-----------------|-------|----------|
|                | TE copy number | Mb    | Genome % | Copy number | Mb    | Region % | Copy number     | Mb    | Region % |
| <i>DLA112</i>  | 72901          | 48.00 | 19.02    | 49853       | 28.18 | 12.67    | 22930           | 19.74 | 70.34    |
| <i>DLA155B</i> | 62999          | 40.08 | 16.94    | 45592       | 25.39 | 11.86    | 17371           | 14.66 | 65.76    |
| <i>DLA146</i>  | 68658          | 45.42 | 18.40    | 47874       | 27.22 | 12.36    | 20682           | 18.15 | 68.35    |
| <i>LBV88</i>   | 68593          | 45.81 | 18.70    | 48922       | 28.06 | 12.81    | 19582           | 17.68 | 68.74    |
| <i>LBV136</i>  | 64343          | 40.79 | 17.26    | 45792       | 24.97 | 11.73    | 18406           | 15.73 | 67.59    |
| <i>LBV11</i>   | 71803          | 47.59 | 19.58    | 50187       | 28.95 | 13.40    | 21564           | 18.60 | 70.22    |
| <i>AcolNI</i>  | 75745          | 50.81 | 20.21    | 48537       | 26.10 | 11.95    | 27205           | 24.70 | 74.77    |

219 TE copy number, TE content in megabases and percentage of the genome represented by TEs.

220 Values are given for the whole genome and for the euchromatin and heterochromatin  
 221 compartments separately.

222

223 **TEs are nonrandomly distributed throughout the genome**

224 As expected, we found that the percentage of TEs in euchromatin, 11.73%-13.40%, is much  
 225 lower than the percentage of TEs in heterochromatin, 65.76%-74.77%, (Table 2 and Figure 4A).  
 226 None of the TE families identified were exclusive to either the euchromatin or heterochromatin.  
 227 However, 45 families were enriched in the euchromatin ( $\chi^2$  test, p-value < 0.01) including 12 out  
 228 of the 32 *mTA* MITE families (Additional file 1: Table S5). This is in line with what has been  
 229 previously reported in *Ae. aegypti* (62). We also observed that the TE distribution was uneven

230 between the chromosomes, and as expected, the X chromosome had a larger fraction of its  
231 euchromatin spanned by TEs (Figure 4B) (63).

232

233 Finally, we also determine the distribution of TE insertions regarding genes. We divided the  
234 genome in five regions: 1 kb upstream, exon, intron, 1 kb downstream and intergenic (64). More  
235 than half of the genes (7,239) in *An. coluzzii* had TEs either in their body or 1 kb upstream or  
236 downstream. Many of these genes (3,888/7,239) had insertions in all seven genomes, while 1,065  
237 genes have an insertion only in one genome. We found that the number of insertions in  
238 intergenic regions was higher than expected by chance while the number of insertions in exons  
239 was lower ( $\chi^2$  p-value < 0.001; Figure 4C; Additional file 1: Table S6). The upstream and  
240 downstream regions behaved differently: the downstream region had a smaller amount of TEs  
241 than expected by chance and the upstream region was neither enriched nor depleted for TE  
242 insertions (p-value = 0; Additional file 1: Table S6). This is possibly linked with the chromatin  
243 state of these regions given that downstream regions are more commonly in a closed chromatin  
244 state (64).

245

246 Focusing on the TE orders, we observed that LTR elements were more abundant on intergenic  
247 regions while SINEs were more abundant on introns, and DNA elements were more abundant in  
248 introns and in the upstream region ( $\chi^2$  p-value < 2.03e-3; Figure 4C; Additional file 1: Table  
249 S7A). MITEs, which are non-autonomous DNA elements have been reported to be more  
250 abundant in the introns and flanking regions of genes (65). We observed the same behavior for  
251 *mTA* and *m3bp* MITEs, which are more abundant in upstream regions and introns, and *m8bp*  
252 MITEs which are more abundant in introns (Additional file 1: Table S7B).

253

254 Overall, TEs are not randomly distributed in the genome, as they are more abundant in  
255 heterochromatic than in euchromatic regions, more abundant in the X chromosome than in  
256 autosomes, and more abundant in intergenic regions than in gene bodies or gene flanking  
257 regions.

258

### 259 **MITE insertions are present in several inversion breakpoints**

260 TEs have been suggested to be involved in chromosome rearrangements within the *An. gambiae*  
261 complex. Indeed, TEs have been found in close proximity to the breakpoints of the 2La in *An.*  
262 *gambiae* and *An. melas*, and to the breakpoints of the 2Rb inversions in *An. gambiae* and *An.*  
263 *coluzzii* (66, 67). We thus explored the TE content in the breakpoints of the 2La and 2Rb, and  
264 three other common polymorphic inversions in *An. coluzzii*: 2Rc, 2Rd, and 2Ru (68). The  
265 analysis of the breakpoint regions suggested that our genomes have the standard conformation  
266 for all five inversions (see Material and Methods; Additional file 1: Table S8). We identified  
267 several TEs nearby the proximal and the distal breakpoints of 2La and 2Rb, in agreement with  
268 previous studies (Figure 5) (26, 66, 67). For the standard 2La proximal breakpoint, Sharakhov et  
269 al. (66) identified several DNA transposons and a SINE insertion. We also identified a cluster of  
270 MITE insertions, which are DNA transposons; however, we additionally identified an *Outcast*  
271 (LINE) element (Figure 5). Regarding the standard 2La distal breakpoint, we observed two  
272 MITEs similar to one of the insertions in the proximal breakpoint, which was in agreement with  
273 the findings by Sharakhov et al. (66) (Figure 5). We also observed similar behavior in the 2Rb  
274 breakpoints, such as the one described by Lobo et al., (67): tandem repeats flanking the inversion  
275 in the standard and inverted forms, and TEs in the internal sequences of both breakpoints (Figure

276 5). For the 2Rd inversion, we identified MITEs near both breakpoints. Finally, we have also  
277 described here for the first time, TE insertions that are present in the distal breakpoint of  
278 inversion 2Ru but not near the estimated proximal breakpoint; although in the latter case we  
279 were able to identify reads spanning the breakpoints in the seven genomes (69).

280

### 281 **TE insertions from active families might affect the regulation of functionally relevant genes**

282 To identify potentially active TE families, we first estimated their relative age by analyzing the  
283 TE landscapes (70, 71). We observed an “L” shape landscape in all genomes which is indicative  
284 of a recent TE burst (Additional file 4: Figure S3) (72). This “L” shape landscape, dominated by  
285 retrotransposons, had previously been described for the sister species *An. gambiae* (71, 73),  
286 where numerous Gypsy LTR Retrotransposons (up to 75%) might currently be active (74, 75).  
287 We further investigated the families in the peak of the landscape and we identified eight families  
288 with more than two identical full-length fragments and with more than half of their copies  
289 identical to the consensus (Additional file 1: Table S9). Additionally, we assessed the potential  
290 ability of our candidates to actively transpose by identifying their intact open read frames  
291 (ORFs), LTRs (in the case of LTR retrotransposons), and target site duplications (TSDs), and  
292 determined that seven of these families are potentially fully capable of transposing, and thus  
293 confirming that these families might be responsible for the recent retrotransposon burst in *An.*  
294 *coluzzii* (Additional file 1: Table S9).

295

296 To assess the potential functional consequences of the TE insertions from these seven putatively  
297 active families, we focused on insertions that occurred in introns, exons, and 1 kb upstream or  
298 downstream of a gene. We identified 80 genes with insertions from these families, with five

299 genes containing up to two insertions in the same gene region Additional file 1: Table Sand since  
300 these are all recent insertions, one plausible explanation for those found at high frequencies is  
301 that they are subject to positive selection (76) (Additional file 1: Table S10; Additional file 5:  
302 Figure S4). We found that 8 insertions were present in all seven genomes analyzed, 24 were  
303 present in two or more genomes while 53 were present in a single genome (Additional file 1:  
304 Table S11). We focused on the genes containing insertions in two or more genomes to look for  
305 functional enrichment. However, we found no significant GO enrichment terms using  
306 PANTHER (77). No significant GO enrichment was either found when considering all genes  
307 with nearby insertions.

308

309 To further investigate the potential role of TE insertions from active families on the function of  
310 nearby genes, we looked for functional information on all the genes, and focused on seven of  
311 them that have functions related to vectorial capacity: insecticide resistance, immunity, and  
312 biting ability (Table 3). We checked whether the TE insertions nearby these genes contained  
313 binding sites for transcription factors or promoter motifs (Additional file 1: Table S12;  
314 Additional file 1: Table S13). We focused on identifying binding sites for three transcription  
315 factors that are known to be involved in response to xenobiotics (cap'n'collar: *cnc*) and in  
316 immune response and development (dorsal: *dl* and signal transducer and activator of  
317 transcription: *STAT*) given the availability of matrix profiles from *D. melanogaster* (78, 79). We  
318 identified binding sites for either *dl*, *STAT* or both in three insertions; interestingly the  
319 *Acol\_gypsy\_Ele18* and the *Acol\_copia\_Ele8* insertions have more than three binding sites for the  
320 same transcription factors, suggesting that they might be functional sites (Table 3) (80).  
321 Additionally, the genes that contained these TEs insertions also contained binding sites for these

322 same transcription factor, which suggests that these factors already played a prior role in their  
 323 regulation. We also identified a putative promoter sequence in the *Acol\_copia\_Ele24* insertion  
 324 found upstream of the CLIPA1 protease encoded by AGAP011794 which could also lead to  
 325 changes in the regulation of this gene (Additional file 1: Table S14).

326

327 **Table 3. TE insertions from putatively active families.**

| TE family               | Insert size (bp) | TE Freq. | Gene       | Function                               | Possible phenotype [Reference]             | TFBS                                  |
|-------------------------|------------------|----------|------------|----------------------------------------|--------------------------------------------|---------------------------------------|
| <i>Acol_copia_Ele24</i> | 2233             | 5/5      | AGAP012452 | Concanavalin A-like lectin/glucanase   | Insecticide resistance [1]                 | -                                     |
| <i>Acol_copia_Ele8</i>  | 3230 (200)*      | 2/4      | AGAP012466 | cuticular protein RR-2 family 146      | Development, insecticide resistance [2, 3] | <i>dl</i> (3) and <i>STAT</i> (5)     |
| <i>Acol_copia_Ele24</i> | 167              | 4/4      |            |                                        |                                            | -                                     |
| <i>Acol_gypsy_Ele65</i> | 185              | 3/3      | AGAP010620 | Peptidase S1, PA clan                  | Immunity, digestion [4, 5]                 | -                                     |
| <i>Acol_gypsy_Ele18</i> | 4858             | 1/6      | AGAP029191 | Defective proboscis extension response | "Bendy" proboscis [6]                      | <i>dl</i> (3-7) and <i>STAT</i> (1-6) |
| <i>Acol_copia_Ele24</i> | 168              | 1/6      | AGAP011794 | CLIPA1 protein                         | Digestion, immunity or development [7]     | -                                     |



|                                    |     |     |            |                          |                               |               |
|------------------------------------|-----|-----|------------|--------------------------|-------------------------------|---------------|
| <i>Acol_gypsy_</i><br><i>Ele18</i> | 235 | 1/7 | AGAP002633 | Gustatory receptor<br>53 | Vectorial<br>capacity [8]     | -             |
| <i>Acol_gypsy_</i><br><i>Ele65</i> | 141 | 1/3 | AGAP028069 | Peptidase S1, PA<br>clan | Immunity,<br>digestion [5, 6] | <i>dl</i> (1) |

328 TE Freq. specifies the number of genomes where the TE insertion was found and the number of  
329 genomes where the gene was correctly transferred. References in the Phenotype column are as  
330 follows: 1 (81), 2 (82), 3 (83), 4 (84), 5 (85), 6 (86), 7 (87), 8 (88). The number in parenthesis in  
331 the transcription factor binding site (TFBS) column refers to the number (or range) of TFBS  
332 found in the TE. \*The insertion size in parenthesis refers to an insertion found in one of the  
333 genomes corresponding to a solo-LTR insertion.

334

### 335 **TE insertions could influence the regulation of genes involved in insecticide resistance**

336 The usage of pyrethroids, carbamates, and DDT as vector control mechanisms has led to the  
337 rapid dispersion of insecticide resistance alleles in natural populations (89-93). Among the best  
338 characterized resistance point mutations are L1014F (*kdr-west*), L1014S (*kdr-east*), and N1575Y  
339 in the voltage gated sodium channel *para* (also known as *vgsc*), and G119S in the  
340 acetylcholinesterase *ace-1* gene (94-96). We first investigated whether the seven genomes  
341 analyzed in this work contained these resistance alleles. We found the *kdr-west* mutation in the  
342 six genomes from Douala and Libreville but not in *AcolNI* genome (48). None of the other  
343 mutations were identified, however a previously undescribed nonsynonymous substitution  
344 (L1688M) in the fourth domain of *para* was identified in the aforementioned six genomes.  
345 Whether this replacement also increases insecticide resistance is yet to be assessed.

346

347 TEs have been hypothesized to play a relevant role specifically in response to insecticides (97-  
348 99), and a few individual insertions affecting insecticide tolerance in anopheline mosquitoes  
349 have already been described (100). Thus, we searched for TE insertions in the neighborhood of  
350 insecticide-related genes that could lead to differences in their regulation. We focused on well-  
351 known insecticide resistance genes as well as considering genes that have been shown to be  
352 differentially expressed in *An. gambiae* when exposed to insecticides (Additional file 1: Table  
353 S14; Additional file 6: Figure S5) (3, 101-103). We found that 23 out of the 43 genes analyzed  
354 contained at least one TE insertion. We also observed that *para* had the largest number of TE  
355 insertions (48 in average per genome, mainly in its introns) from this set of genes. This is an  
356 exception, given that the average number of insertions per gene is 2.95 for members of this set  
357 which falls within the expected number of insertions per gene in all the genome (t-test, p-values  
358 > 0.2).

359  
360 Only one of the insertions, a solo LTR element of *Acol\_Pao\_Bel\_Ele43* from the *Pao-Bel*  
361 superfamily and present in all the genomes analyzed, was located in the 3' UTR of *GSTE2*.  
362 Interestingly, an upstream insertion possibly affecting the expression level of this gene has  
363 previously been identified in *An. funestus* (100). To determine if TEs could influence the  
364 regulation of insecticide-resistance genes, we focused on polymorphic (present in two or more  
365 genomes) and fixed (present in all seven genomes analyzed) insertions located in introns or 1 kb  
366 upstream of the gene. We searched for *cnc* binding sites, and for those insertions located in gene  
367 upstream regions we also looked for promoter motifs (Additional file 1: Table S12; Additional  
368 file 1: Table S13). We identified 15 insertions in 10 genes containing either *cnc* binding sites or  
369 promoter sequences. One insertion located in *CYP4C28* and two insertions in *para* contained

370 binding sites for *cnc*, although the genes did not contain binding sites for this transcription factor.  
371 Additionally, we identified 12 insertions containing promoter motifs and located nearby nine  
372 genes (Figure 6). In some cases, such as the *Acol\_m2bp\_Ele10* MITE insertion in *ABCA4* or the  
373 *tSINE* insertion in *GSTMS2*, while the same TE insertion was found in six and seven genomes  
374 respectively, the promoter motifs were found only in four and one genome respectively (Figure  
375 6; Additional file 1: Table S13). We analyzed the consensus sequence of these two families and  
376 we found that while the *Acol\_m2bp\_Ele10* had the promoter motif, the *tSINE* did not, suggesting  
377 that some of the *Acol\_m2bp\_Ele10* elements lost the promoter motifs while the *tSINE* copies  
378 acquired them.

379

### 380 **Immune response genes could also be affected by TEs**

381 Mosquitoes breeding in urban and polluted aquatic environments overexpress immune-related  
382 genes suggesting that immune response is relevant for urban adaptation (104). To assess the  
383 potential role of TEs in immune response, we searched for TE insertions in genes putatively  
384 involved in immunity according to ImmunoDB (105)(Additional file 1: Table S15). We  
385 identified 466 TE insertions in 156 out of the 281 genes analyzed. The number of insertions in  
386 each gene varied greatly going from 60 genes with a single insertion to AGAP000940, a gene  
387 coding for a C-type lectin and spanning 107.2 kb, with 48 insertions. The frequency of these  
388 insertions was also variable with 184 (39.5%) of the insertions being fixed, 208 (44.6%)  
389 polymorphic and 74 (15.9%) unique. We further explored polymorphic and fixed insertions and  
390 identified binding sites for *dl* and *STAT* and promoter motifs. We found that 20 TEs contained  
391 bindings sites for *dl*, 23 TEs contained binding sites for *STAT* and 12 TEs contained binding sites

392 both for *dl* and *STAT* (Additional file 1: Table S15). Additionally, we identified 82 insertions, in  
393 the upstream region of 58 genes, which carried putative promoter sequences.

394

395 We identified TE insertions in three different antimicrobial peptides (AMPs). AMPs form the  
396 first line of host defense against infection and are a key component of the innate immune system,  
397 however none had transcription factor binding sites (TFBS) for *dl* or *STAT*. It is important to  
398 keep in mind that there are other TF that participate in the regulation of AMPs and that both *dl*  
399 and *STAT* are also involved in other biological processes (106). Interestingly we also identified  
400 TEs with TFBS for *dl* in the vicinity of STAT1 and STAT2 which might lead to novel regulatory  
401 mechanisms of the JAK/STAT signaling pathway. Furthermore, 11 of the 156 genes containing  
402 TE insertions are differentially expressed in response to a *Plasmodium* invasion. These genes  
403 participate in several pathways of the immune response including the small regulatory RNA  
404 pathway, pathogen recognition, the nitric oxide response and ookinete melanization (79, 107-  
405 109). Four of the TEs affecting these genes added TFBS and promoter sequences, thus  
406 suggesting that these TE insertions can presumably influence the response to this pathogen (110)  
407 (Table 4).

408

409 **Table 4. TE insertions in *Plasmodium* responsive genes from the immune system.**

| Gene ID    | Gene symbol | Function | # of TE insertions | Family                | Frequency | Promoter | TFBS                              |
|------------|-------------|----------|--------------------|-----------------------|-----------|----------|-----------------------------------|
| AGAP002625 | CTL9        | CTLs     | 1                  | -                     | -         | No       | -                                 |
| AGAP003663 | RM62B       | SRRPs    | 2                  | <i>Acol_mTA_Ele11</i> | 7/7       | No       | <i>dl</i> (1),<br><i>STAT</i> (1) |

|            |         |       |    |                          |     |     |                 |
|------------|---------|-------|----|--------------------------|-----|-----|-----------------|
| AGAP004845 | SCRB8   | SCRs  | 4  | <i>Acol_ otherMITEs_</i> | 7/7 | No  | <i>STAT</i> (1) |
|            |         |       |    | <i>Eles16</i>            |     |     |                 |
| AGAP004845 | SCRB8   | SCRs  | 4  | <i>Acol_</i>             | 7/7 | Yes | <i>STAT</i> (1) |
|            |         |       |    | <i>Pao_Bel_Ele35</i>     |     |     |                 |
| AGAP005203 | PGRPLC1 | PGRPs | 1  | -                        | -   | No  | -               |
| AGAP008844 | GALE1   | GALEs | 1  | <i>Acol_ m3bp_Ele11</i>  | 7/7 | Yes | -               |
| AGAP009033 | HPX2    | PRDXs | 1  | -                        | -   | No  | -               |
| AGAP009887 | R2D2    | SRRPs | 1  | -                        | -   | No  | -               |
| AGAP011204 | AUB     | SRRPs | 3  | -                        | -   | No  | -               |
| AGAP011717 | AGO1    | SRRPs | 16 | <i>Acol_ mTA_Ele31</i>   | 6/7 | No  | <i>dl</i> (1)   |
| AGAP011780 | CLIPA4  | CLIPs | 1  | -                        | -   | No  | -               |
| AGAP011792 | CLIPA7  | CLIPs | 1  | -                        | -   | No  | -               |

410

411 Family and frequency are only shown for TEs with TFBS or promoter sequences. In the Function  
 412 column the following abbreviations are used: C-Type Lectins (CTLs), Small Regulatory RNA  
 413 Pathway Members (SRRPs), Scavenger Receptors (SCRs), Peptidoglycan Recognition Proteins  
 414 (PGRPs), Galactoside-Binding Lectins (GALEs), Peroxidases (PRDXs), CLIP-Domain Serine  
 415 Proteases (CLIPs).

416

## 417 **DISCUSSION**

418 In this study, we *de novo* annotated transposable element (TE) insertions in seven genomes of  
 419 *An. coluzzii*, six of them newly sequenced here. A comprehensive genome-wide TE annotation  
 420 was possible because we used long-read technologies to perform the genome sequencing and  
 421 assembly. Long-reads allow identifying TE insertions with high confidence given that the entire  
 422 TE insertion sequence can be spanned by a single read (29, 30). While the genome-wide TE

423 repertoire has been studied in other anopheline species, particularly in *An. gambiae*, to our  
424 knowledge there are no other studies that have explored TE variation in multiple genomes from a  
425 single species (31, 32, 35, 39, 71, 111). We observed that increasing the number of available  
426 genomes analyzed allowed us to increase the number of identified TE families from a median of  
427 244 (172-294) to 435 (Figure 1B). Moreover, having the full sequences of seven genomes also  
428 allowed us to discover 64 new TE families, including four TRIM families previously  
429 undescribed in anopheline genomes that are likely to be important players in genome evolution  
430 (56, 57). The wide range of families identified across genomes was not directly related to the  
431 quality of the genome assembly taking into consideration the more generally used quality  
432 parameters such as read length, number of contigs, and contig N50 (112). This suggests that  
433 there are possibly other characteristics of each genome that affect the identification of high  
434 quality TE families, such as biases in the location of the TE insertions given that TE families are  
435 challenging to identify in regions with low complexity or with numerous nested TEs.  
436 Nonetheless, the identification of TE families is dependent on the methodology used to perform  
437 TE annotations, therefore different annotation strategies could lead to the discovery of still  
438 undescribed families (59).

439  
440 The availability of several genome assemblies also allowed us to determine that the majority of  
441 the intraspecies differences in the TE content were in heterochromatic regions, most likely due to  
442 differences in the quality of the genome assembly. Nevertheless, there were also significant  
443 differences in the TE content in euchromatic regions, reflecting true intraspecific variability as  
444 has been previously observed in several organisms including *Drosophila* (76, 113), mammals  
445 (114, 115), maize (116) and *Arabidopsis* (117). TE insertions were not randomly distributed

446 throughout the genome and instead were consistently enriched in intergenic regions, most likely  
447 due to purifying selection, as suggested in the wild grass *Brachypodium distachyon* (118). In  
448 *Drosophila*, TE enrichment in intergenic regions was also observed in addition to enrichment in  
449 the intronic region, which we did not observe in *An. coluzzii* (119). We also analyzed the TE  
450 content in the breakpoints of five common polymorphic inversions, three of them analyzed here  
451 for the first time. We found TE insertions in all but one of the inversion breakpoints, with MITE  
452 elements the most common TE family, as already described in the 2Rd' inversion in *An.*  
453 *arabiensis* (26) (Figure 5).

454  
455 The choice to use samples from urban environments allowed us to take a first look into the role  
456 of TEs in rapid adaptation to novel habitats (120). We focused on insertions from recently active  
457 families located near genes that are relevant for the vectorial capacity of *An. coluzzii*. Because  
458 adaptation can also happen from standing variation, in the case of insecticide resistance genes,  
459 which have been shown to be shaped by TE insertions in several organisms, and immune-related  
460 genes, we analyzed all insertions independently of their age (100, 121, 122). While the role of  
461 nonsynonymous substitutions and copy number variation in resistance to insecticides commonly  
462 used in urban environments has been studied, the potential role of TEs has not yet been  
463 comprehensively assessed in *An. coluzzii* or any other anopheline species (19, 103, 123-125). In  
464 the genomes we assessed, we identified several insertions that were polymorphic or fixed nearby  
465 functionally relevant genes (Table 3, Table 4 and Figure 6). Some of the identified candidate  
466 insertions contained binding sites for transcription factors related to the function of nearby genes  
467 and promoter regions. Besides adding regulatory regions, TEs can also affect the regulation of  
468 nearby genes by affecting gene splicing and generating long non-coding RNAs among many

469 other molecular mechanisms (25, 126-129). Thus, it is possible that the candidate TE insertions  
470 identified that lack binding sites and promoters could be affecting nearby genes through other  
471 molecular mechanisms. Our results are a first approximation to the potential role of TEs in *An.*  
472 *coluzzii* adaptation to the challenging environment that urban ecosystems entail. Establishing a  
473 direct link between the TEs and the traits involved in urban adaptation will require sampling a  
474 larger number of individuals and characterizing the phenotypes associated with the insertions.

475

476

## 477 **CONCLUSIONS**

478 The long-read sequencing of seven *An. coluzzii* genomes from urban environments allowed us to  
479 capture to a larger extent the diversity of TE families and TE insertions and to assess their impact  
480 in the genome architecture and genome function in this species. While there was an enrichment  
481 of TE insertions in intergenic regions, we found several insertions located in the 1 kb flanking  
482 regions or inside genes relevant for the vectorial capacity of this species. Furthermore, we found  
483 that some of these TE insertions are adding regulatory regions and as such they could influence  
484 the regulation of these genes. The genomic resources and the results that we present in this work  
485 provide a basis for future studies of the impact of TEs in the biology of *An. coluzzii*. This will  
486 allow increasing our knowledge on a species which besides being interesting from an  
487 evolutionary perspective, given its high levels of genetic diversity and the strong anthropogenic  
488 pressures it faces, is of great importance to human health. A better understanding of the biology  
489 of *An. coluzzii* and its ability to rapidly adapt to urban environments will further facilitate the  
490 development of novel strategies to combat malaria. Better management strategies can be



491 implemented if we understand and are able to predict changes in the frequency of genetic  
492 variants relevant for the vectorial capacity of this species.

493

494

## 495 **MATERIALS AND METHODS**

### 496 **Sample collection and DNA isolation**

497 We sampled *An. coluzzii* larvae in two cities of Central Africa: Libreville, Gabon, in January  
498 2016 and Douala, Cameroon, in April 2018. A systematic inspection of potential breeding sites  
499 was conducted to determine the presence of *Anopheles* larvae. We manually separated the  
500 anopheline from the culicine larvae based on morphological recognition and positioning of their  
501 bodies on or under the water surface (Robert, 2017). We collected immature 3rd and 4th stage  
502 larvae of *Anopheles* from water bodies using the standard dipping method (Service, 1993). We  
503 collected 25 larvae from each site and stored them in 1.5 ml of absolute ethanol. After each daily  
504 sampling session, the samples were stored at -20 °C.

505

506 All the samples were PCR tested to differentiate *An. coluzzii* larvae from *An. gambiae* larvae  
507 before library preparation, using primers SINE200\_F (TCGCCTTAGACCTTGCGTTA) and  
508 SINE200\_R (CGCTTCAAGAATTCGAGATAC) (45). For PacBio sequencing, DNA from a  
509 single *An. coluzzii* larva from the *LBVII* site was extracted using the MagAttract HMW DNA  
510 extraction kit (Qiagen) following manufacturer's instructions. Briefly, the larva was air-dried and  
511 lysed in 240 µl of buffer ATL (proteinase K added) shaking overnight at 56 °C. Next, the DNA  
512 was isolated using the MagAttract magnetic beads and eluted twice in 50 µl of buffer AE. The  
513 DNA concentration was measured using a Qubit fluorometer. For Nanopore sequencing, DNA

514 from six larvae from each of the five breeding sites was extracted either with the QiaAMP UCP  
515 DNA kit (Qiagen) or MagAttract HMW DNA extraction kit (Qiagen). For the QiaAMP UCP  
516 DNA kit, we followed the manufacturer's instructions. Each larva was air-dried and lysed in 200  
517  $\mu$ l of buffer AUT (proteinase K added) shaking overnight at 56 °C, then DNA was isolated using  
518 a QIAamp UCP MinElute column and eluted twice in 25  $\mu$ l of buffer AUE. For the MagAttract  
519 HMW DNA extraction kit, we followed manufacturer's instructions but using lower buffer  
520 amounts to increase DNA concentration. Briefly, each larva was lysed in 120  $\mu$ l of buffer ATL  
521 (proteinase K added) shaking overnight at 56 °C, then DNA was isolated using the MagAttract  
522 magnetic beads and eluted twice in 25  $\mu$ l of buffer AE. The DNA concentration was measured  
523 using a Qubit fluorometer. Both elutions of the same sample were mixed before library  
524 preparation. For Illumina sequencing, DNA from one larva from each of the six different  
525 breeding sites was extracted following the same extraction protocol as for Nanopore sequencing.

526

### 527 **Library preparation and sequencing**

528 Quality control of the DNA sample for PacBio sequencing (Qubit, NanoDrop and Fragment  
529 analyzer) was performed at the Center for Genomic Research facility of the University of  
530 Liverpool prior to library preparation. The library was prepared by shearing DNA to obtain  
531 fragments of approximately 30 kb and sequenced on 2 SMRT cells using Sequel SMRT cell, 3.0  
532 chemistry. Nanopore libraries were constructed using the Native Barcoding Expansion 1-12  
533 (PCR-free) and the Ligation Sequencing Kit following manufacturer's instructions. A minimum  
534 of 400 ng of DNA from each larva was used to start with the library workflow. For each  
535 breeding site, six larvae were barcoded, and equal amounts of each barcoded sample were pooled  
536 prior to sequencing. The samples from the same breeding site were ran in a single R9.4 flow cell

537 in a 48-hour run, except for sample *DLA112* which was run in two flow cells. The DNA  
538 concentration was assessed during the whole procedure to ensure enough DNA was available for  
539 sequencing.

540  
541 The quality control of the samples, library preparation and Illumina sequencing was performed at  
542 the Center for Genomic Research facility of the University of Liverpool. Low input libraries  
543 were prepared with the NEBNext Ultra II FS DNA library kit (300 bp inserts) on the Mosquito  
544 platform, using a 1/10 reduced volume protocol. Paired-end sequencing was performed on the  
545 Illumina Novaseq platform using S2 chemistry (2x150 bp).

546

#### 547 **Genome Assemblies**

548 The PacBio sequenced genome was assembled using *Canu* version 1.8 (130) with an estimated  
549 genome size of 250Mb and parameters: ‘*stopOnLowCoverage=5, corMinCoverage=0,*  
550 *correctedErrorRate=0.105, CorMhapFilterThreshold=0.0000000002, corMhapOptions="--*  
551 *threshold 0.80 --num-hashes 512 --num-min-matches 3 --ordered-sketch-size 1000 --ordered-*  
552 *kmer-size 14 --min-olap-length 2000 --repeat-idf-scale 50" mhapMemory=60g,*  
553 *mhapBlockSize=500, ovlMerDistinct=0.975*’. Next, we identified and removed allelic variants  
554 using *purge\_haplotigs* version 1.0.4 (131) with the “*-l 15 -m 100 -h 195*” parameters. The  
555 Nanopore genomes were assembled using *Canu* version 1.8 using the same parameters as  
556 previously described, except for *correctedErrorRate* which was set to 0.16, followed by a round  
557 of polishing using *racon* version 1.3.3 (132), followed by *nanopolish* version 0.11.1 (133) and  
558 *pilon* version 1.23-0 (134) with the fix parameter set on ‘*bases*’. *Pilon* requires high coverage  
559 short-read data to perform the polishing and these data came from the aforementioned single

560 larvae sequenced from each of the sites. Finally, *blobtools* version 1.1.1 (135) was used to  
561 remove contamination from all six genome assemblies taking into consideration fragment sizes,  
562 their taxonomic assignment and the coverage using the Illumina reads.

563  
564 As a proxy of the completeness, the BUSCO values for the six newly assembled genomes plus  
565 the *AcolNI* genome were obtained using BUSCO version 3.0.2 (49) with the *diptera\_odb9* set as  
566 reference. Finally, the contigs for all seven assemblies were ordered and merged with *RaGOO*  
567 v1.1 (136) using the chromosome level *An. gambiae* AgamP4 assembly.

568

#### 569 **Gene annotation transfer**

570 The *gff* for the genome annotation for AgamP4 was transferred into the newly assembled  
571 genomes using *Liftoff* (137) with default parameters. The annotation was manually inspected  
572 using *UGENE* version 35 (138) and whenever needed the annotation was accordingly corrected.  
573 96% of the AgamP4 genes were correctly transferred.

574

#### 575 **Construction of the curated TE library and *de novo* TE annotation**

576 We ran the *TEdenovo* pipeline (50) independently on each of the seven genomes with default  
577 parameters. The obtained consensus in each genome were further filtered by discarding those  
578 generated with only one sequence, with less than one full-length fragment mapping to the  
579 genome, or with less than three full-length copies (Additional file 1: Table S2). The remaining  
580 consensus were manually curated to remove redundant sequences and artifacts by manual  
581 inspection of coverage plots generated using the *plotCoverage* tool from REPET and  
582 visualization of the structural features on the genome browser IGV version 2.4.19 (139).

583  
584 To ensure that we identified as much of the TE diversity as possible, the *TEfam*  
585 ([tefam.biochem.vt.edu](http://tefam.biochem.vt.edu)) database, which contains the TE libraries for several species of  
586 mosquitoes, was used to annotate the seven genomes using *RepeatMasker* version open-4.0.9  
587 (Smit et al. 2015). Families with more than three matches longer than 90% in any genome were  
588 selected and their hit with the highest identity from each genome was extracted. These sequences  
589 were added to the REPET library and all the consensus were clustered using CD-HIT version  
590 4.8.1 (140) with the *-c* and *-s* parameters set to 0.8. 85 clusters contain sequences only identified  
591 by TEfam. The sequences belonging to the same cluster were used to perform a multiple  
592 sequence alignment and the consensus were obtained.

593  
594 The consensus were classified using PASTEC (141) with default parameters. Next their  
595 bidirectional best-hits were calculated using BLAST (142) against the TEfam  
596 ([tefam.biochem.vt.edu](http://tefam.biochem.vt.edu)), AnoteExcel (143) and Repbase (144) databases. When more than 80%  
597 of a consensus matched to a feature from the databases with an identity higher than 80%, the  
598 classification was transferred to the consensus. While not an order *per se*, MITEs were grouped  
599 together for subsequent analysis. Additionally, we classified the families based on the  
600 conservation of features characteristic of their orders into putative autonomous, putative  
601 autonomous lacking terminal inverted repeats (TIRs) or long terminal repeats (LTRs), putative  
602 non-autonomous, such as MITEs and TRIMs, and degenerated (Additional file 1: Table  
603 S4)(Fonseca et al 2019). These classified consensus were used to re-annotate the assembled  
604 genomes with the *TEannot* pipeline using default parameters and we discarded copies whose  
605 length overlapped >80% with satellite annotations (51).

606

## 607 **Transfer of TE annotations to the *AcolNI* reference genome**

608 We transferred the TE annotations from the six genomes we sequenced to the *AcolNI* genome.

609 First, we selected only TEs mapping to genes (including 1 kb upstream and 1 kb downstream) in

610 each of the six genomes and built a *gff* file including two 1 kb long “anchors” adjacent to each

611 TE. We transferred these features considering each anchor and the TE as exons using the Liftoff

612 tool with the *-exclude\_partial -overlap 1 -s 0.8* parameters (137). We discarded transfers where

613 the transferred TE was shorter than 10 bp or any of the anchors was shorter than 500 bp.

614 Discarded transfers and TEs not transferred were used for a second round where a new *gff* was

615 created with two 1 kb long anchors but this time located 500 bp away from each end of the TE.

616 and the previously described transfer process was performed. A third round of transfer was

617 performed this time with anchors located 1 kb away from the TE insertion. The TE positions and

618 family of each transferred TE were conserved. Finally, for all non-transferred TEs we generated

619 a new *gff* file with only the two anchors and no TE and transferred these features using the same

620 methodology. In these cases, the distance between both anchors was conserved as the transferred

621 TE coordinates and the TE family was conserved.

622

623 We discarded TEs that were not transferred to genes (plus 1 kb upstream and downstream) in the

624 *AcolNI* genome. Using *GenomicRanges* we identified overlaps between TEs in the *AcolNI*

625 genome and transferred TEs. We allowed a distance of up to 10 bp between matches and when a

626 TE from the same family was found in the same position we considered the TE as present.

627 Finally, for TEs that were transferred using only the anchors we identified overlaps between the

628 six genomes to calculate the frequencies of these non-reference TE insertions.

629

### 630 **Identification of newly described families in other species**

631 We analyzed all 10 available fully sequenced species from the Pyretophorus series, which  
632 belongs to the Cellia subgenus. We also included an additional five *Anopheles* species, three  
633 from each of the other series from the Cellia subgenus and two from the other subgenera with  
634 available fully sequenced species. As outgroups we included the genomes of *Cx.*  
635 *quinquefasciatus*, *Ae. aegypti* and *D. melanogaster*. *RepeatMasker* version open-4.0.9 (Smit et  
636 al. 2015) was run with default parameters using the 64 newly described families as the library on  
637 the following genomes: *An. albimanus* (AalbS2), *An. atroparvus* (AatrE3), *An. farauti* (AfarF2),  
638 *An. funestus* (AfunF3), *An. stephensi* (AsteS1), *An. epiroticus* (AepiE1), *An. christyi* (AchrA1),  
639 *An. merus* (AmerM2), *An. gambiae* (AgamP4), *An. coluzzii* (AcolN1), *An. melas* (AmelC2), *An.*  
640 *arabiensis* (AaraD1), *An. quadriannulatus* (AquaS1), *An. bwambae* (Abwa2) and *An. fontenillei*  
641 (ASM881789v1), *Cx. quinquefasciatus* (CulPip1.0), *Ae. aegypti* (AaegL5.0) and *D.*  
642 *melanogaster* (ISO1 release 6).

643

### 644 **Identification of heterochromatin**

645 The coordinates for the pericentric heterochromatin, compact intercalary heterochromatin, and  
646 diffuse intercalary heterochromatin in *An. gambiae* AgamP3 were obtained from a previous work  
647 (61). The *An. gambiae* AgamP3 genome assembly was mapped against the seven *An. coluzzii*  
648 genome assemblies using *progressiveMauve* (145) and the corresponding coordinates on each of  
649 the assemblies were retrieved. To identify families enriched in either euchromatin or  
650 heterochromatin a  $\chi^2$  test of independence was performed.

651

652 **Transfer of known inversion breakpoints**

653 The coordinates for inversions 2La, 2Rb, 2Rc and 2Rd were obtained from Corbett-Detig et al.,  
654 (68) and for 2Ru from (69). 50 kb regions flanking each side of the insertion were obtained and  
655 mapped using *minimap2* (146) against the scaffolded genome assemblies to transfer the  
656 breakpoints. To validate the breakpoint, we determined if long reads spanned the breakpoint  
657 using the genome browser IGV version 2.4.19 (139).

658

659 **Detection of putatively active TE families**

660 To identify potentially active TE families, we identified families with more than two identical  
661 full-length fragment copies in at least six of the seven annotated genomes. We determined the  
662 fraction of identical copies of these families by identifying all their insertions in the genome and  
663 calculating the sequence identity of all their bases against the consensus by performing a  
664 nucleotide BLAST. Given that the polishing of the genomes using Illumina reads could have  
665 modified the sequence of the insertions thus affecting the age estimation, we used dnaPipeTE  
666 (147) to estimate the relative age of the TE families using the raw Illumina reads for the six  
667 genomes that we sequenced. We compared the TE landscape obtained using dnaPipeTE with that  
668 obtained using the BLAST procedure, using a Kolmogorov-Smirnov test corrected for multiple  
669 testing using the Benjamini–Hochberg procedure (Additional file 1: Table S16). Given that we  
670 observed few significant differences, we continued using the landscape data obtained using the  
671 BLAST procedure. We identified the families where the majority of the bases of their insertions  
672 were on the peak of identical sequences in the TE landscape (>50% of the bases with >99% base  
673 identity) in more than five of the seven genomes we analyzed. Finally, we assessed the ability to



674 actively transpose of strong candidates by identifying their intact ORFs, LTRs (in the case of  
675 LTR retrotransposons) and target site duplication (TSD).

676

### 677 **Classification of TEs by their genomic location**

678 To determine the location of TEs we used the *findOverlaps* function from the  
679 *GenomicAlignments* R package (148) using default parameters. Both the TE and the gene  
680 annotation were converted to *GenomicRanges* objects ignoring strand information in the case of  
681 TEs.

682

### 683 **Insecticide resistance genes**

684 A list with a total of 43 relevant insecticide resistance genes was generated taking several works  
685 into consideration (3, 101-103) (Additional file 1: Table S14). To determine the position of the L  
686 to M nonsynonymous substitution that we observed in AGAP004707 (*para*) we used the position  
687 from the CAM12801.1 reference sequence.

688

### 689 **Immune-related genes**

690 The full list of 414 immune-related genes from *An. gambiae* was downloaded from ImmunoDB  
691 (105). We conserved the 281 most reliable genes filtering by the STATUS field and conserving  
692 only those with A or B scores.

693

### 694 **TFBS and promoter identification**

695 The matrices for *dl* (MA0022.1), *cnc::maf-S* (MA0530.1) and *Stat92E* (MA0532.1) were  
696 downloaded from JASPAR (<http://jaspar.genereg.net/>) (149). The sequences for the TEs of

697 interest were obtained using *getSeq* from the *Biostrings* R package. The TFBS in the sequences  
698 were identified using the web version of FIMO (150) from the MEME SUITE (151) with default  
699 parameters. The ElemeNT online tool was used to identify promoter motifs (152).

700

## 701 **DECLARATIONS**

702

### 703 **Ethics approval and consent to participate**

704 Not applicable.

705

### 706 **Consent for publication**

707 Not applicable.

708

### 709 **Availability of data and materials**

710 All the genome sequencing data obtained in this work, as well as the genome assembly are  
711 available in NCBI SRA and NCBI Genbank respectively, under the BioProject accession number  
712 PRJNA676011.

713

### 714 **Competing interests**

715 The authors declare that they have no competing interests.

716

### 717 **Funding**

718 This study was supported by the Ministry of Economy, Industry and Competitiveness of Spain  
719 (BFU2017-82937-P) to JG. DA was supported by an ANR grant (ANR-18-CE35-0002-01 –  
720 WILDING). NMLP was funded by AUF and CIRMF scholarships.

721

## 722 **Authors' contributions**

723 DA and JG conceived and designed the experiments. NMLP, SEN and LA performed the data  
724 generation. CVC, DA and JG performed the data analysis. CVC and JG wrote and revised the  
725 manuscript with input from all authors. All authors read and approved the final manuscript.

726

## 727 **Acknowledgements**

728 We thank members of the González Lab for comments on the manuscript. We thank the Ecology  
729 of Vectorial Systems team at the CIMRF (Franceville, Gabon) for their support in field  
730 collections. We thank Jean Pierre Agbor and Serge Donfanck for their commitment in larvae  
731 collections in Douala (Cameroon).

732

## 733 **Authors' information**

734 Twitter handles: @VargasChavezC (Carlos Vargas-Chavez); @d\_ayalag (Diego Ayala); @  
735 GonzalezLab\_BCN (Josefa González).

736

## 737 **REFERENCES**

738

739 1. Fontaine MC, Pease JB, Steele A, Waterhouse RM, Neafsey DE, Sharakhov IV, et al.  
740 Extensive introgression in a malaria vector species complex revealed by phylogenomics.  
741 Science. 2015;347(6217).

- 742 2. Tene Fossog B, Ayala D, Acevedo P, Kengne P, Ngomo Abeso Mebuy I, Makanga B, et  
743 al. Habitat segregation and ecological character displacement in cryptic African malaria  
744 mosquitoes. *Evolutionary Applications*. 2015;8(4):326-45.
- 745 3. Fossog Tene B, Poupardin R, Costantini C, Awono-Ambene P, Wondji CS, Ranson H, et  
746 al. Resistance to DDT in an Urban Setting: Common Mechanisms Implicated in Both M and S  
747 Forms of *Anopheles gambiae* in the City of Yaoundé Cameroon. *PLOS ONE*. 2013;8(4):e61408.
- 748 4. Kengne P, Charmantier G, Blondeau-Bidet E, Costantini C, Ayala D. Tolerance of  
749 disease-vector mosquitoes to brackish water and their osmoregulatory ability. *Ecosphere*.  
750 2019;10(10):e02783.
- 751 5. Vontas J, Grigoraki L, Morgan J, Tsakireli D, Fuseini G, Segura L, et al. Rapid selection  
752 of a pyrethroid metabolic enzyme CYP9K1 by operational malaria control activities. *Proceedings*  
753 *of the National Academy of Sciences*. 2018;115(18):4619.
- 754 6. Fouet C, Kamdem C, Gamez S, White BJ. Extensive genetic diversity among populations  
755 of the malaria mosquito *Anopheles moucheti* revealed by population genomics. *Infection,*  
756 *Genetics and Evolution*. 2017;48:27-33.
- 757 7. Wiebe A, Longbottom J, Gleave K, Shearer FM, Sinka ME, Massey NC, et al.  
758 Geographical distributions of African malaria vector sibling species and evidence for insecticide  
759 resistance. *Malaria journal*. 2017;16(1):85-.
- 760 8. Perugini E, Guelbeogo WM, Calzetta M, Manzi S, Virgillito C, Caputo B, et al.  
761 Behavioural plasticity of *Anopheles coluzzii* and *Anopheles arabiensis* undermines LLIN  
762 community protective effect in a Sudanese-savannah village in Burkina Faso. *Parasites &*  
763 *vectors*. 2020;13(1):277-.
- 764 9. Coluzzi M, Sabatini A, della Torre A, Di Deco MA, Petrarca V. A Polytene Chromosome  
765 Analysis of the *Anopheles gambiae* Species Complex. *Science*.  
766 2002;298(5597):1415.
- 767 10. Ayala D, Acevedo P, Pombi M, Dia I, Boccolini D, Costantini C, et al. Chromosome  
768 inversions and ecological plasticity in the main African malaria mosquitoes. *Evolution*.  
769 2017;71(3):686-701.
- 770 11. Costantini C, Ayala D, Guelbeogo WM, Pombi M, Some CY, Bassole IHN, et al. Living  
771 at the edge: biogeographic patterns of habitat segregation conform to speciation by niche  
772 expansion in *Anopheles gambiae*. *BMC Ecology*. 2009;9(1):16.
- 773 12. Simard F, Ayala D, Kamdem GC, Pombi M, Etouna J, Ose K, et al. Ecological niche  
774 partitioning between *Anopheles gambiae* molecular forms in Cameroon: the ecological side of  
775 speciation. *BMC Ecology*. 2009;9(1):17.
- 776 13. Coluzzi M, Sabatini A, Petrarca V, Di Deco MA. Chromosomal differentiation and  
777 adaptation to human environments in the *Anopheles gambiae* complex. *Transactions of The*  
778 *Royal Society of Tropical Medicine and Hygiene*. 1979;73(5):483-97.
- 779 14. Fouet C, Gray E, Besansky NJ, Costantini C. Adaptation to Aridity in the Malaria  
780 Mosquito *Anopheles gambiae*: Chromosomal Inversion Polymorphism and Body Size Influence  
781 Resistance to Desiccation. *PLOS ONE*. 2012;7(4):e34841.
- 782 15. Ayala D, Zhang S, Chateau M, Fouet C, Morlais I, Costantini C, et al. Association  
783 mapping desiccation resistance within chromosomal inversions in the African malaria vector  
784 *Anopheles gambiae*. *Molecular Ecology*. 2019;28(6):1333-42.
- 785 16. Labbé P, Berthomieu A, Berticat C, Alout H, Raymond M, Lenormand T, et al.  
786 Independent Duplications of the Acetylcholinesterase Gene Conferring Insecticide Resistance in  
787 the Mosquito *Culex pipiens*. *Molecular Biology and Evolution*. 2007;24(4):1056-67.

- 788 17. Assogba BS, Djogbénou LS, Milesi P, Berthomieu A, Perez J, Ayala D, et al. An ace-1  
789 gene duplication resorbs the fitness cost associated with resistance in *Anopheles gambiae*, the  
790 main malaria mosquito. *Scientific Reports*. 2015;5(1):14529.
- 791 18. Weetman D, Djogbenou LS, Lucas E. Copy number variation (CNV) and insecticide  
792 resistance in mosquitoes: evolving knowledge or an evolving problem? *Current opinion in insect*  
793 *science*. 2018;27:82-8.
- 794 19. Lucas ER, Miles A, Harding NJ, Clarkson CS, Lawniczak MKN, Kwiatkowski DP, et al.  
795 Whole-genome sequencing reveals high complexity of copy number variation at insecticide  
796 resistance loci in malaria mosquitoes. *Genome Research*. 2019;29(8):1250-61.
- 797 20. Mitri C, Markianos K, Guelbeogo WM, Bischoff E, Gneme A, Eiglmeier K, et al. The  
798 kdr-bearing haplotype and susceptibility to *Plasmodium falciparum* in *Anopheles gambiae*:  
799 genetic correlation and functional testing. *Malaria Journal*. 2015;14(1):391.
- 800 21. Kamdem C, Fouet C, Gamez S, White BJ. Pollutants and Insecticides Drive Local  
801 Adaptation in African Malaria Mosquitoes. *Mol Biol Evol*. 2017;34(5):1261-75.
- 802 22. King SA, Onayifeke B, Akorli J, Sibomana I, Chabi J, Manful-Gwira T, et al. The Role  
803 of Detoxification Enzymes in the Adaptation of the Major Malaria Vector *Anopheles gambiae*  
804 (Giles; Diptera: Culicidae) to Polluted Water. *Journal of Medical Entomology*. 2017;54(6):1674-  
805 83.
- 806 23. Casacuberta E, González J. The impact of transposable elements in environmental  
807 adaptation. *Molecular Ecology*. 2013;22(6):1503-17.
- 808 24. Schrader L, Schmitz J. The impact of transposable elements in adaptive evolution.  
809 *Molecular Ecology*. 2019;28(6):1537-49.
- 810 25. Chuong EB, Elde NC, Feschotte C. Regulatory activities of transposable elements: From  
811 conflicts to benefits. *Nature Reviews Genetics*. 2017;18(2):71-86.
- 812 26. Mathiopoulos KD, Della Torre A, Predazzi V, Petrarca V, Coluzzi M. Cloning of  
813 inversion breakpoints in the *Anopheles gambiae* complex traces a transposable element at the  
814 inversion junction. *Proceedings of the National Academy of Sciences of the United States of*  
815 *America*. 1998;95(21):12444-9.
- 816 27. Gray YH. It takes two transposons to tango: transposable-element-mediated chromosomal  
817 rearrangements. *Trends Genet*. 2000;16(10):461-8.
- 818 28. Reis M, Vieira CP, Lata R, Posnien N, Vieira J. Origin and Consequences of  
819 Chromosomal Inversions in the virilis Group of *Drosophila*. *Genome Biology and Evolution*.  
820 2018;10(12):3152-66.
- 821 29. Logsdon GA, Vollger MR, Eichler EE. Long-read human genome sequencing and its  
822 applications. *Nature Reviews Genetics*. 2020;21(10):597-614.
- 823 30. Shahid S, Slotkin RK. The current revolution in transposable element biology enabled by  
824 long reads. *Current Opinion in Plant Biology*. 2020;54:49-56.
- 825 31. Holt RA, Subramanian GM, Halpern A, Sutton GG, Charlab R, Nusskern DR, et al. The  
826 Genome Sequence of the Malaria Mosquito *Anopheles gambiae*. *Science*. 2002;298(5591):129-  
827 49.
- 828 32. Marinotti O, Cerqueira GC, De Almeida LGP, Ferro MIT, Da Silva Loreto EL, Zaha A,  
829 et al. The Genome of *Anopheles darlingi*, the main neotropical malaria vector. *Nucleic Acids*  
830 *Research*. 2013;41(15):7387-400.
- 831 33. Jiang X, Peery A, Hall AB, Sharma A, Chen XG, Waterhouse RM, et al. Genome  
832 analysis of a major urban malaria vector mosquito, *Anopheles stephensi*. *Genome biology*.  
833 2014;15(9):459-.

- 834 34. Zhou D, Zhang D, Ding G, Shi L, Hou Q, Ye Y, et al. Genome sequence of *Anopheles*  
835 *sinensis* provides insight into genetics basis of mosquito competence for malaria parasites. *BMC*  
836 *Genomics*. 2014;15(1).
- 837 35. Neafsey DE, Waterhouse RM, Abai MR, Aganezov SS, Alekseyev MA, Allen JE, et al.  
838 Highly evolvable malaria vectors: The genomes of 16 *Anopheles* mosquitoes. *Science*.  
839 2015;347(6217).
- 840 36. Lau YL, Lee WC, Chen J, Zhong Z, Jian J, Amir A, et al. Draft genomes of *Anopheles*  
841 *cracens* and *Anopheles maculatus*: Comparison of simian malaria and human malaria vectors in  
842 peninsular Malaysia. *PLoS ONE*. 2016;11(6):1-24.
- 843 37. Chakraborty M, Ramaiah A, Adolfi A, Halas P, Kaduskar B, Ngo LT, et al. Hidden  
844 features of the malaria vector mosquito, *Anopheles stephensi*, revealed by a high-  
845 quality reference genome. *bioRxiv*. 2020:2020.05.24.113019.
- 846 38. Compton A, Liang J, Chen C, Lukyanchikova V, Qi Y, Potters M, et al. The beginning of  
847 the end: a chromosomal assembly of the New World malaria mosquito ends with a novel  
848 telomere. *bioRxiv*. 2020:2020.04.17.047084.
- 849 39. de Melo ES, Wallau GdL. Transposable elements are constantly exchanged by horizontal  
850 transfer reshaping mosquito genomes. *bioRxiv*. 2020:2020.06.23.166744.
- 851 40. Yang X, Lee WP, Ye K, Lee C. One reference genome is not enough. *Genome Biology*.  
852 2019;20(1):19-21.
- 853 41. Bayer PE, Golicz AA, Scheben A, Batley J, Edwards D. Plant pan-genomes are the new  
854 reference. *Nature Plants*. 2020;6(8):914-20.
- 855 42. Weissensteiner MH, Bunikis I, Catalán A, Francoijs K-J, Knief U, Heim W, et al.  
856 Discovery and population genomics of structural variation in a songbird genus. *Nature*  
857 *Communications*. 2020;11(1):3403.
- 858 43. Quesneville H, Nouaud D, Anxolabéhère D. P elements and MITE relatives in the whole  
859 genome sequence of *Anopheles gambiae*. *BMC Genomics*. 2006;7.
- 860 44. Boulesteix M, Simard F, Antonio-Nkondjio C, Awono-Ambene HP, Fontenille D,  
861 Biémont C. Insertion polymorphism of transposable elements and population structure of  
862 *Anopheles gambiae* M and S molecular forms in Cameroon. *Molecular Ecology*.  
863 2007;16(2):441-52.
- 864 45. Santolamazza F, Mancini E, Simard F, Qi Y, Tu Z, Della Torre A. Insertion  
865 polymorphisms of SINE200 retrotransposons within speciation islands of *Anopheles gambiae*  
866 molecular forms. *Malaria Journal*. 2008;7:1-10.
- 867 46. Esnault C, Boulesteix M, Duchemin JB, Koffi AA, Chandre F, Dabiré R, et al. High  
868 genetic differentiation between the M and S molecular forms of *Anopheles gambiae* in Africa.  
869 *PloS one*. 2008;3(4):e1968-e.
- 870 47. Salgueiro P, Moreno M, Simard F, O'Brochta D, Pinto J. New Insights into the  
871 Population Structure of *Anopheles gambiae* s.s. in the Gulf of Guinea Islands Revealed by  
872 Herves Transposable Elements. *PLoS ONE*. 2013;8(4).
- 873 48. Kingan SB, Heaton H, Cudini J, Lambert CC, Baybayan P, Galvin BD, et al. A high-  
874 quality de novo genome assembly from a single mosquito using pacbio sequencing. *Genes*.  
875 2019;10(1).
- 876 49. Simão FA, Waterhouse RM, Ioannidis P, Kriventseva EV, Zdobnov EM. BUSCO:  
877 assessing genome assembly and annotation completeness with single-copy orthologs.  
878 *Bioinformatics*. 2015;31(19):3210-2.

- 879 50. Flutre T, Duprat E, Feuillet C, Quesneville H. Considering Transposable Element  
880 Diversification in De Novo Annotation Approaches. PLOS ONE. 2011;6(1):e16526.
- 881 51. Quesneville H, Bergman CM, Andrieu O, Autard D, Nouaud D, Ashburner M, et al.  
882 Combined evidence annotation of transposable elements in genome sequences. PLoS  
883 computational biology. 2005;1(2):166-75.
- 884 52. Platt RN, 2nd, Blanco-Berdugo L, Ray DA. Accurate Transposable Element Annotation  
885 Is Vital When Analyzing New Genome Assemblies. Genome biology and evolution.  
886 2016;8(2):403-10.
- 887 53. Marsano RM, Leroni D, D'Addabbo P, Viggiano L, Tarasco E, Caizzi R. Mosquitoes  
888 LTR retrotransposons: a deeper view into the genomic sequence of *Culex quinquefasciatus*. PLoS  
889 one. 2012;7(2):e30770-e.
- 890 54. Zhou Y, Cahan SH. A Novel Family of Terminal-Repeat Retrotransposon in Miniature  
891 (TRIM) in the Genome of the Red Harvester Ant, *Pogonomyrmex barbatus*. PLoS ONE.  
892 2012;7(12).
- 893 55. Elisk CG, Worley KC, Bennett AK, Beye M, Camara F, Childers CP, et al. Finding the  
894 missing honey bee genes: lessons learned from a genome upgrade. BMC Genomics.  
895 2014;15(1):86.
- 896 56. Witte C-P, Le QH, Bureau T, Kumar A. Terminal-repeat retrotransposons in miniature  
897 (TRIM) are involved in restructuring plant genomes. Proceedings of the National Academy of  
898 Sciences. 2001;98(24):13778.
- 899 57. Gao D, Li Y, Kim KD, Abernathy B, Jackson SA. Landscape and evolutionary dynamics  
900 of terminal repeat retrotransposons in miniature in plant genomes. Genome Biology.  
901 2016;17(1):7.
- 902 58. Barrón MG, Paupy C, Rahola N, Akone-Ella O, Ngangue MF, Wilson-Bahun TA, et al.  
903 A new species in the major malaria vector complex sheds light on reticulated species evolution.  
904 Scientific Reports. 2019;9(1):1-13.
- 905 59. Vargas-Chavez C, González J. Transposable elements in *Anopheles* species: refining  
906 annotation strategies towards population-level analysis. In: Dupuis ORaJ, editor. Population  
907 Genomics: Insects: Springer; 2021.
- 908 60. Sessegolo C, Bulet N, Haudry A. Strong phylogenetic inertia on genome size and  
909 transposable element content among 26 species of flies. Biology Letters. 2016;12(8):0-3.
- 910 61. Sharakhova MV, George P, Brusentsova IV, Leman SC, Bailey JA, Smith CD, et al.  
911 Genome mapping and characterization of the *Anopheles gambiae* heterochromatin. BMC  
912 Genomics. 2010;11(1):459.
- 913 62. Tu Z. Three novel families of miniature inverted-repeat transposable elements are  
914 associated with genes of the yellow fever mosquito, *Aedes aegypti*. Proceedings of the National  
915 Academy of Sciences of the United States of America. 1997;94(14):7475-80.
- 916 63. Xia A, Sharakhova MV, Leman SC, Tu Z, Bailey JA, Smith CD, et al. Genome landscape  
917 and evolutionary plasticity of chromosomes in malaria mosquitoes. PLoS ONE. 2010;5(5).
- 918 64. Ruiz JL, Ranford-Cartwright LC, Gómez-Díaz E. The regulatory genome of the malaria  
919 vector *Anopheles gambiae*: integrating chromatin accessibility and gene expression.  
920 bioRxiv. 2020:2020.06.22.164228.
- 921 65. Tu Z. Eight novel families of miniature inverted repeat transposable elements in the  
922 African malaria mosquito, *Anopheles gambiae*. Proceedings of the National Academy of  
923 Sciences of the United States of America. 2001;98(4):1699-704.

- 924 66. Sharakhov IV, White BJ, Sharakhova MV, Kayondo J, Lobo NF, Santolamazza F, et al.  
925 Breakpoint structure reveals the unique origin of an interspecific chromosomal inversion (2La) in  
926 the *Anopheles gambiae* complex. *Proceedings of the National Academy of Sciences of the*  
927 *United States of America*. 2006;103(16):6258-62.
- 928 67. Lobo NF, Sangaré DM, Regier AA, Reidenbach KR, Bretz DA, Sharakhova MV, et al.  
929 Breakpoint structure of the *Anopheles gambiae* 2Rb chromosomal inversion. *Malaria journal*.  
930 2010;9:293-.
- 931 68. Corbett-Detig RB, Said I, Calzetta M, Genetti M, McBroom J, Maurer NW, et al. Fine-  
932 Mapping Complex Inversion Breakpoints and Investigating Somatic Pairing in the  
933 *Anopheles gambiae* Species Complex Using Proximity-Ligation Sequencing.  
934 *Genetics*. 2019;213(4):1495.
- 935 69. White BJ, Cheng C, Sangaré D, Lobo NF, Collins FH, Besansky NJ. The population  
936 genomics of trans-specific inversion polymorphisms in *Anopheles gambiae*. *Genetics*.  
937 2009;183(1):275-88.
- 938 70. Smit A, Hubley R, Green P. *RepeatMasker Open-4.0* 2013-2015 [Available from:  
939 <http://www.repeatmasker.org>.
- 940 71. Diesel JF, Ortiz MF, Marinotti O, Vasconcelos ATR, Loreto ELS. A re-annotation of the  
941 *Anopheles darlingi mobilome*. *Genetics and Molecular Biology*. 2019;42(1):125-31.
- 942 72. Fonseca PM, Moura RD, Wallau GL, Loreto ELS. The mobilome of *Drosophila*  
943 *incompta*, a flower-breeding species: comparison of transposable element landscapes among  
944 generalist and specialist flies. *Chromosome Research*. 2019;27(3):203-19.
- 945 73. Petersen M, Armisén D, Gibbs RA, Hering L, Khila A, Mayer G, et al. Diversity and  
946 evolution of the transposable element repertoire in arthropods with particular reference to  
947 insects. *BMC Evolutionary Biology*. 2019;19(1):11-.
- 948 74. Tubío JMC, Naveira H, Costas J. Structural and evolutionary analyses of the Ty3/gypsy  
949 group of LTR retrotransposons in the genome of *Anopheles gambiae*. *Molecular Biology and*  
950 *Evolution*. 2005;22(1):29-39.
- 951 75. Tubío JMC, Tojo M, Bassaganyas L, Escaramis G, Sharakhov IV, Sharakhova MV, et al.  
952 Evolutionary Dynamics of the Ty3/Gypsy LTR Retrotransposons in the Genome of *Anopheles*  
953 *gambiae*. *PLOS ONE*. 2011;6(1):e16328.
- 954 76. Rech GE, Bogaerts-Márquez M, Barrón MG, Merenciano M, Villanueva-Cañas JL,  
955 Horváth V, et al. Stress response, behavior, and development are shaped by transposable  
956 element-induced mutations in *Drosophila*. *PLOS Genetics*. 2019;15(2):e1007900.
- 957 77. Mi H, Muruganujan A, Ebert D, Huang X, Thomas PD. PANTHER version 14: more  
958 genomes, a new PANTHER GO-slim and improvements in enrichment analysis tools. *Nucleic*  
959 *acids research*. 2019;47(D1):D419-D26.
- 960 78. Ingham VA, Pignatelli P, Moore JD, Wagstaff S, Ranson H. The transcription factor Maf-  
961 S regulates metabolic resistance to insecticides in the malaria vector *Anopheles gambiae*. *BMC*  
962 *genomics*. 2017;18(1):669-.
- 963 79. Osta MA, Christophides GK, Vlachou D, Kafatos FC. Innate immunity in the malaria  
964 vector *Anopheles gambiae*: comparative and functional genomics. *Journal of*  
965 *Experimental Biology*. 2004;207(15):2551.
- 966 80. Xie D, Chen C-C, Ptaszek LM, Xiao S, Cao X, Fang F, et al. Rewirable gene regulatory  
967 networks in the preimplantation embryonic development of three mammalian species. *Genome*  
968 *research*. 2010;20(6):804-15.



- 969 81. Bonizzoni M, Afrane Y, Dunn WA, Atieli FK, Zhou G, Zhong D, et al. Comparative  
970 Transcriptome Analyses of Deltamethrin-Resistant and -Susceptible *Anopheles gambiae*  
971 Mosquitoes from Kenya by RNA-Seq. PLOS ONE. 2012;7(9):e44607.
- 972 82. Vannini L, Willis JH. Localization of RR-1 and RR-2 cuticular proteins within the cuticle  
973 of *Anopheles gambiae*. Arthropod structure & development. 2017;46(1):13-29.
- 974 83. Balabanidou V, Kefi M, Aivaliotis M, Koidou V, Girotti JR, Mijailovsky SJ, et al.  
975 Mosquitoes cloak their legs to resist insecticides. Proceedings Biological sciences.  
976 2019;286(1907):20191091-.
- 977 84. Sriwichai P, Rongsiryam Y, Jariyapan N, Sattabongkot J, Apiwathnasorn C, Nacapunchai  
978 D, et al. Cloning of a Trypsin-like Serine Protease and expression Patterns during *Plasmodium*  
979 *falciparum* invasion in the mosquito, *Anopheles dirus* (Peyton and Harrison). Archives of Insect  
980 Biochemistry and Physiology. 2012;80(3):151-65.
- 981 85. Dias-Lopes G, Borges-Veloso A, Saboia-Vahia L, Domont GB, Britto C, Cuervo P, et al.  
982 Expression of active trypsin-like serine peptidases in the midgut of sugar-feeding female  
983 *Anopheles aquasalis*. Parasites & vectors. 2015;8:296-.
- 984 86. Hughes GL, Ren X, Ramirez JL, Sakamoto JM, Bailey JA, Jedlicka AE, et al. Wolbachia  
985 Infections in *Anopheles gambiae* Cells: Transcriptomic Characterization of a Novel Host-  
986 Symbiont Interaction. PLOS Pathogens. 2011;7(2):e1001296.
- 987 87. Cao X, Gulati M, Jiang H. Serine protease-related proteins in the malaria mosquito,  
988 *Anopheles gambiae*. Insect biochemistry and molecular biology. 2017;88:48-62.
- 989 88. Kent LB, Walden KKO, Robertson HM. The Gr Family of Candidate Gustatory and  
990 Olfactory Receptors in the Yellow-Fever Mosquito *Aedes aegypti*. Chemical Senses.  
991 2008;33(1):79-93.
- 992 89. Dabiré RK, Namountougou M, Diabaté A, Soma DD, Bado J, Toé HK, et al. Distribution  
993 and frequency of *kdr* mutations within *Anopheles gambiae* s.l. populations and first report of the  
994 *ace.1* G119S mutation in *Anopheles arabiensis* from Burkina Faso (West Africa). PloS one.  
995 2014;9(7):e101484-e.
- 996 90. Silva APB, Santos JMM, Martins AJ. Mutations in the voltage-gated sodium channel  
997 gene of anophelines and their association with resistance to pyrethroids - a review. Parasites &  
998 vectors. 2014;7:450-.
- 999 91. Cheung J, Mahmood A, Kalathur R, Liu L, Carlier PR. Structure of the G119S Mutant  
1000 Acetylcholinesterase of the Malaria Vector *Anopheles gambiae* Reveals Basis of Insecticide  
1001 Resistance. Structure (London, England : 1993). 2018;26(1):130-6.e2.
- 1002 92. Elanga-Ndille E, Nouage L, Ndo C, Binyang A, Assatse T, Nguiffo-Nguete D, et al. The  
1003 G119S Acetylcholinesterase (Ace-1) Target Site Mutation Confers Carbamate Resistance in the  
1004 Major Malaria Vector *Anopheles gambiae* from Cameroon: A Challenge for the Coming IRS  
1005 Implementation. Genes. 2019;10(10):790.
- 1006 93. Fadel AN, Ibrahim SS, Tchouakui M, Terence E, Wondji MJ, Tchoupo M, et al. A  
1007 combination of metabolic resistance and high frequency of the 1014F *kdr* mutation is driving  
1008 pyrethroid resistance in *Anopheles coluzzii* population from Guinea savanna of Cameroon.  
1009 Parasites & Vectors. 2019;12(1):263.
- 1010 94. Santolamazza F, Calzetta M, Etang J, Barrese E, Dia I, Caccone A, et al. Distribution of  
1011 knock-down resistance mutations in *Anopheles gambiae* molecular forms in west and west-  
1012 central Africa. Malaria Journal. 2008;7(1):74.
- 1013 95. Jones CM, Liyanapathirana M, Agossa FR, Weetman D, Ranson H, Donnelly MJ, et al.  
1014 Footprints of positive selection associated with a mutation (N1575Y) in the voltage-gated

- 1015 sodium channel of *Anopheles gambiae*. Proceedings of the National Academy of Sciences of the  
1016 United States of America. 2012;109(17):6614-9.
- 1017 96. Essandoh J, Yawson AE, Weetman D. Acetylcholinesterase (Ace-1) target site mutation  
1018 119S is strongly diagnostic of carbamate and organophosphate resistance in *Anopheles gambiae*  
1019 s.s. and *Anopheles coluzzii* across southern Ghana. *Malaria Journal*. 2013;12(1):404.
- 1020 97. Wilson TG. Transposable Elements as Initiators of Insecticide Resistance. *Journal of*  
1021 *Economic Entomology*. 1993;86(3):645-51.
- 1022 98. ffrench-Constant R, Daborn P, Feyereisen R. Resistance and the jumping gene.  
1023 *BioEssays*. 2006;28(1):6-8.
- 1024 99. Rostant WG, Wedell N, Hosken DJ. Chapter 2 - Transposable Elements and Insecticide  
1025 Resistance. In: Goodwin SF, Friedmann T, Dunlap JC, editors. *Advances in Genetics*. 78:  
1026 Academic Press; 2012. p. 169-201.
- 1027 100. Weedall GD, Riveron JM, Hearn J, Irving H, Kamdem C, Fouet C, et al. An Africa-wide  
1028 genomic evolution of insecticide resistance in the malaria vector *Anopheles funestus* involves  
1029 selective sweeps, copy number variations, gene conversion and transposons. *PLOS Genetics*.  
1030 2020;16(6):e1008822.
- 1031 101. Main BJ, Everitt A, Cornel AJ, Hormozdiari F, Lanzaro GC. Genetic variation associated  
1032 with increased insecticide resistance in the malaria mosquito, *Anopheles coluzzii*. *Parasites &*  
1033 *vectors*. 2018;11(1):225-.
- 1034 102. Adolphi A, Poulton B, Anthousi A, Macilwee S, Ranson H, Lycett GJ. Functional genetic  
1035 validation of key genes conferring insecticide resistance in the major African malaria vector,  
1036 *Anopheles gambiae*. Proceedings of the National Academy of Sciences.  
1037 2019;116(51):25764.
- 1038 103. Bamou R, Sonhafouo-Chiana N, Mavridis K, Tchuinkam T, Wondji CS, Vontas J, et al.  
1039 Status of Insecticide Resistance and Its Mechanisms in *Anopheles gambiae* and *Anopheles*  
1040 *coluzzii* Populations from Forest Settings in South Cameroon. *Genes*. 2019;10(10):741.
- 1041 104. Cassone BJ, Kamdem C, Cheng C, Tan JC, Hahn MW, Costantini C, et al. Gene  
1042 expression divergence between malaria vector sibling species *Anopheles gambiae* and  
1043 *An. coluzzii* from rural and urban Yaoundé Cameroon. *Molecular Ecology*. 2014;23(9):2242-59.
- 1044 105. Waterhouse RM, Kriventseva EV, Meister S, Xi Z, Alvarez KS, Bartholomay LC, et al.  
1045 Evolutionary dynamics of immune-related genes and pathways in disease-vector mosquitoes.  
1046 *Science (New York, NY)*. 2007;316(5832):1738-43.
- 1047 106. Clayton AM, Dong Y, Dimopoulos G. The *Anopheles* Innate Immune System in the  
1048 Defense against Malaria Infection. *Journal of Innate Immunity*. 2014;6(2):169-81.
- 1049 107. Volz J, Müller H-M, Zdanowicz A, Kafatos FC, Osta MA. A genetic module regulates  
1050 the melanization response of *Anopheles* to *Plasmodium*. *Cellular Microbiology*. 2006;8(9):1392-  
1051 405.
- 1052 108. Oliveira GdA, Lieberman J, Barillas-Mury C. Epithelial nitration by a peroxidase/NOX5  
1053 system mediates mosquito antiplasmodial immunity. *Science (New York, NY)*.  
1054 2012;335(6070):856-9.
- 1055 109. Dennison NJ, BenMarzouk-Hidalgo OJ, Dimopoulos G. MicroRNA-regulation of  
1056 *Anopheles gambiae* immunity to *Plasmodium falciparum* infection and midgut microbiota.  
1057 *Developmental & Comparative Immunology*. 2015;49(1):170-8.
- 1058 110. Ruiz JL, Yerbanga RS, Lefèvre T, Ouedraogo JB, Corces VG, Gómez-Díaz E. Chromatin  
1059 changes in *Anopheles gambiae* induced by *Plasmodium falciparum* infection. *Epigenetics &*  
1060 *Chromatin*. 2019;12(1):5.

- 1061 111. Fernández-Medina RD, Ribeiro JMC, Carareto CMA, Velasque L, Struchiner CJ. Losing  
1062 identity: structural diversity of transposable elements belonging to different classes in the  
1063 genome of *Anopheles gambiae*. *BMC genomics*. 2012;13.
- 1064 112. Ou S, Liu J, Chougule KM, Fungtammasan A, Seetharam AS, Stein JC, et al. Effect of  
1065 sequence depth and length in long-read assembly of the maize inbred NC358. *Nature*  
1066 *Communications*. 2020;11(1):2288.
- 1067 113. Kofler R, Nolte V, Schlötterer C. Tempo and Mode of Transposable Element Activity in  
1068 *Drosophila*. *PLOS Genetics*. 2015;11(7):e1005406.
- 1069 114. Rishishwar L, Tellez Villa CE, Jordan IK. Transposable element polymorphisms  
1070 recapitulate human evolution. *Mobile DNA*. 2015;6:21-.
- 1071 115. Diehl AG, Ouyang N, Boyle AP. Transposable elements contribute to cell and species-  
1072 specific chromatin looping and gene regulation in mammalian genomes. *Nature*  
1073 *Communications*. 2020;11(1):1796.
- 1074 116. Haberer G, Kamal N, Bauer E, Gundlach H, Fischer I, Seidel MA, et al. European maize  
1075 genomes highlight intraspecies variation in repeat and gene content. *Nature Genetics*.  
1076 2020;52(9):950-7.
- 1077 117. Quadrana L, Bortolini Silveira A, Mayhew GF, LeBlanc C, Martienssen RA, Jeddelloh  
1078 JA, et al. The *Arabidopsis thaliana* mobilome and its impact at the species level. *eLife*.  
1079 2016;5:e15716.
- 1080 118. Stritt C, Wyler M, Gimmi EL, Pippel M, Roulin AC. Diversity, dynamics and effects of  
1081 long terminal repeat retrotransposons in the model grass *Brachypodium distachyon*. *New*  
1082 *Phytologist*. 2020;227(6):1736-48.
- 1083 119. Cridland JM, Macdonald SJ, Long AD, Thornton KR. Abundance and distribution of  
1084 transposable elements in two *Drosophila* QTL mapping resources. *Molecular biology and*  
1085 *evolution*. 2013;30(10):2311-27.
- 1086 120. Johnson MTJ, Munshi-South J. Evolution of life in urban environments. *Science*.  
1087 2017;358(6363):eaam8327.
- 1088 121. Mateo L, Ullastres A, González J. A Transposable Element Insertion Confers Xenobiotic  
1089 Resistance in *Drosophila*. *PLOS Genetics*. 2014;10(8):e1004560.
- 1090 122. Salces-Ortiz J, Vargas-Chavez C, Guio L, Rech GE, González J. Transposable elements  
1091 contribute to the genomic response to insecticides in *Drosophila melanogaster*. *Philosophical*  
1092 *Transactions of the Royal Society B: Biological Sciences*. 2020;375(1795):20190341.
- 1093 123. Kamgang B, Tchappa W, Ngoagouni C, Sangbakembi-Ngounou C, Wondji M, Riveron  
1094 JM, et al. Exploring insecticide resistance mechanisms in three major malaria vectors from  
1095 Bangui in Central African Republic. *Pathogens and global health*. 2018;112(7):349-59.
- 1096 124. Grau-Bové X, Tomlinson S, O'Reilly AO, Harding NJ, Miles A, Kwiatkowski D, et al.  
1097 Evolution of the Insecticide Target *Rdl* in African *Anopheles* Is Driven by Interspecific and  
1098 Interkaryotypic Introgression. *Molecular Biology and Evolution*. 2020;37(10):2900-17.
- 1099 125. The *Anopheles gambiae* Genomes Consortium. Genome variation and population  
1100 structure among 1142 mosquitoes of the African malaria vector species *Anopheles gambiae* and  
1101 *Anopheles coluzzii*. *Genome Research*. 2020;30(10):1533-46.
- 1102 126. Sundaram V, Cheng Y, Ma Z, Li D, Xing X, Edge P, et al. Widespread contribution of  
1103 transposable elements to the innovation of gene regulatory networks. *Genome research*.  
1104 2014;24(12):1963-76.
- 1105 127. Jiang J-C, Upton KR. Human transposons are an abundant supply of transcription factor  
1106 binding sites and promoter activities in breast cancer cell lines. *Mobile DNA*. 2019;10:16-.

- 1107 128. Villanueva-Cañas JL, Horvath V, Aguilera L, González J. Diverse families of  
1108 transposable elements affect the transcriptional regulation of stress-response genes in *Drosophila*  
1109 *melanogaster*. *Nucleic Acids Research*. 2019;47(13):6842-57.
- 1110 129. Sundaram V, Wysocka J. Transposable elements as a potent source of diverse cis-  
1111 regulatory sequences in mammalian genomes. *Philosophical Transactions of the Royal Society*  
1112 *B: Biological Sciences*. 2020;375(1795):20190347.
- 1113 130. Koren S, Walenz BP, Berlin K, Miller JR, Bergman NH, Phillippy AM. Canu: scalable  
1114 and accurate long-read assembly via adaptive k-mer weighting and repeat separation. *Genome*  
1115 *research*. 2017;27(5):722-36.
- 1116 131. Roach MJ, Schmidt SA, Borneman AR. Purge Haplotigs: allelic contig reassignment for  
1117 third-gen diploid genome assemblies. *BMC Bioinformatics*. 2018;19(1):460.
- 1118 132. Vaser R, Sović I, Nagarajan N, Šikić M. Fast and accurate de novo genome assembly  
1119 from long uncorrected reads. *Genome research*. 2017;27(5):737-46.
- 1120 133. Loman NJ, Quick J, Simpson JT. A complete bacterial genome assembled de novo using  
1121 only nanopore sequencing data. *Nature Methods*. 2015;12(8):733-5.
- 1122 134. Walker BJ, Abeel T, Shea T, Priest M, Abouelliel A, Sakthikumar S, et al. Pilon: An  
1123 Integrated Tool for Comprehensive Microbial Variant Detection and Genome Assembly  
1124 Improvement. *PLOS ONE*. 2014;9(11):e112963.
- 1125 135. Laetsch DR, Blaxter ML. BlobTools: Interrogation of genome assemblies.  
1126 *F1000Research*. 2017;6(1287).
- 1127 136. Alonge M, Soyk S, Ramakrishnan S, Wang X, Goodwin S, Sedlazeck FJ, et al. RaGOO:  
1128 fast and accurate reference-guided scaffolding of draft genomes. *Genome Biology*.  
1129 2019;20(1):224.
- 1130 137. Shumate A, Salzberg SL. Liftoff: an accurate gene annotation mapping tool. *bioRxiv*.  
1131 2020:2020.06.24.169680.
- 1132 138. Okonechnikov K, Golosova O, Fursov M, the Ut. Unipro UGENE: a unified  
1133 bioinformatics toolkit. *Bioinformatics*. 2012;28(8):1166-7.
- 1134 139. Robinson JT, Thorvaldsdóttir H, Winckler W, Guttman M, Lander ES, Getz G, et al.  
1135 Integrative genomics viewer. *Nature biotechnology*. 2011;29(1):24-6.
- 1136 140. Fu L, Niu B, Zhu Z, Wu S, Li W. CD-HIT: accelerated for clustering the next-generation  
1137 sequencing data. *Bioinformatics (Oxford, England)*. 2012;28(23):3150-2.
- 1138 141. Hoede C, Arnoux S, Moisset M, Chaumier T, Inizan O, Jamilloux V, et al. PASTEC: An  
1139 Automatic Transposable Element Classification Tool. *PLOS ONE*. 2014;9(5):e91929.
- 1140 142. Camacho C, Coulouris G, Avagyan V, Ma N, Papadopoulos J, Bealer K, et al. BLAST+:  
1141 architecture and applications. *BMC bioinformatics*. 2009;10:421-.
- 1142 143. Fernández-Medina RD, Struchiner CJ, Ribeiro JMC. Novel transposable elements from  
1143 *Anopheles gambiae*. *BMC Genomics*. 2011;12(1):260-.
- 1144 144. Bao W, Kojima KK, Kohany O. Repbase Update, a database of repetitive elements in  
1145 eukaryotic genomes. *Mobile DNA*. 2015;6(1):4-9.
- 1146 145. Darling AE, Mau B, Perna NT. progressiveMauve: Multiple Genome Alignment with  
1147 Gene Gain, Loss and Rearrangement. *PLOS ONE*. 2010;5(6):e11147.
- 1148 146. Li H. Minimap2: pairwise alignment for nucleotide sequences. *Bioinformatics*.  
1149 2018;34(18):3094-100.
- 1150 147. Goubert C, Modolo L, Vieira C, ValienteMoro C, Mavingui P, Boulesteix M. De novo  
1151 assembly and annotation of the Asian tiger mosquito (*Aedes albopictus*) repeatome with

- 1152 dnaPipeTE from raw genomic reads and comparative analysis with the yellow fever mosquito  
1153 (*Aedes aegypti*). *Genome biology and evolution*. 2015;7(4):1192-205.
- 1154 148. Lawrence M, Huber W, Pagès H, Aboyoun P, Carlson M, Gentleman R, et al. Software  
1155 for Computing and Annotating Genomic Ranges. *PLOS Computational Biology*.  
1156 2013;9(8):e1003118.
- 1157 149. Sandelin A, Alkema W, Engström P, Wasserman WW, Lenhard B. JASPAR: an  
1158 open-access database for eukaryotic transcription factor binding profiles. *Nucleic Acids*  
1159 *Research*. 2004;32(suppl\_1):D91-D4.
- 1160 150. Grant CE, Bailey TL, Noble WS. FIMO: scanning for occurrences of a given motif.  
1161 *Bioinformatics*. 2011;27(7):1017-8.
- 1162 151. Bailey TL, Boden M, Buske FA, Frith M, Grant CE, Clementi L, et al. MEME SUITE:  
1163 tools for motif discovery and searching. *Nucleic Acids Res*. 2009;37(Web Server issue):W202-8.
- 1164 152. Sloutskin A, Danino YM, Orenstein Y, Zehavi Y, Doniger T, Shamir R, et al. ElemeNT:  
1165 a computational tool for detecting core promoter elements. *Transcription*. 2015;6(3):41-50.

1166

1167

1168

1169

1170

1171

1172

1173

1174

1175

1176

1177

1178

1179

1180

1181

1182 **FIGURES**

1183

1184 **Figure 1. Transposable elements in *An. coluzzii*.**

1185 A) Geographic location of the six breeding sites analyzed (in red) and of the place of origin of  
1186 the Ngousso colony (in grey) which was used to generate the *AcolN1* genome. B) Number of TE  
1187 families identified when using a single genome or when using all possible combinations of more  
1188 than one genome. The red line shows the total number of TE families and the blue line shows the  
1189 number of newly described families. C) Classification of all TE families and newly described  
1190 families in *An. coluzzii*. The three most abundant superfamilies from each order are shown.

1191

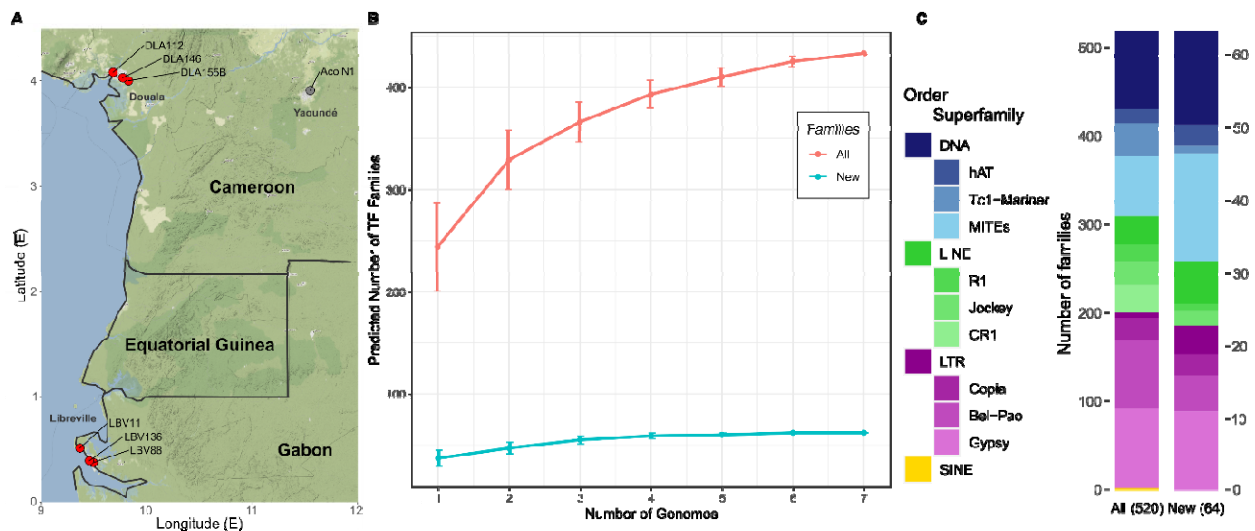

1192

1193

1194

1195

1196

1197

1198 **Figure 2. Structure, abundance and phylogenetic distribution of novel TE families.**

1199 The four newly identified TRIMs families are shown, for the remaining 60 novel families see  
1200 Additional file 2: Figure S1. A) The structure of each new family is displayed: the light blue box  
1201 represents the full extension of the TE and the red arrows represent LTRs. B) All insertions for  
1202 each TE family are shown as a coverage plot where each line represents a copy in a genome. C)  
1203 Phylogenetic distribution of the TE family insertions in 15 members of the *Anopheles* genus,  
1204 *Culex quinquefasciatus*, *Ae. Aegypti* and *D. melanogaster*. The number of insertions with more  
1205 than 80% identity and spanning at least 80% of the consensus, in each species is shown using a  
1206 black and white gradient. Species with no insertions are shown in white while species with 15 or  
1207 more insertions are shown in black.

1208

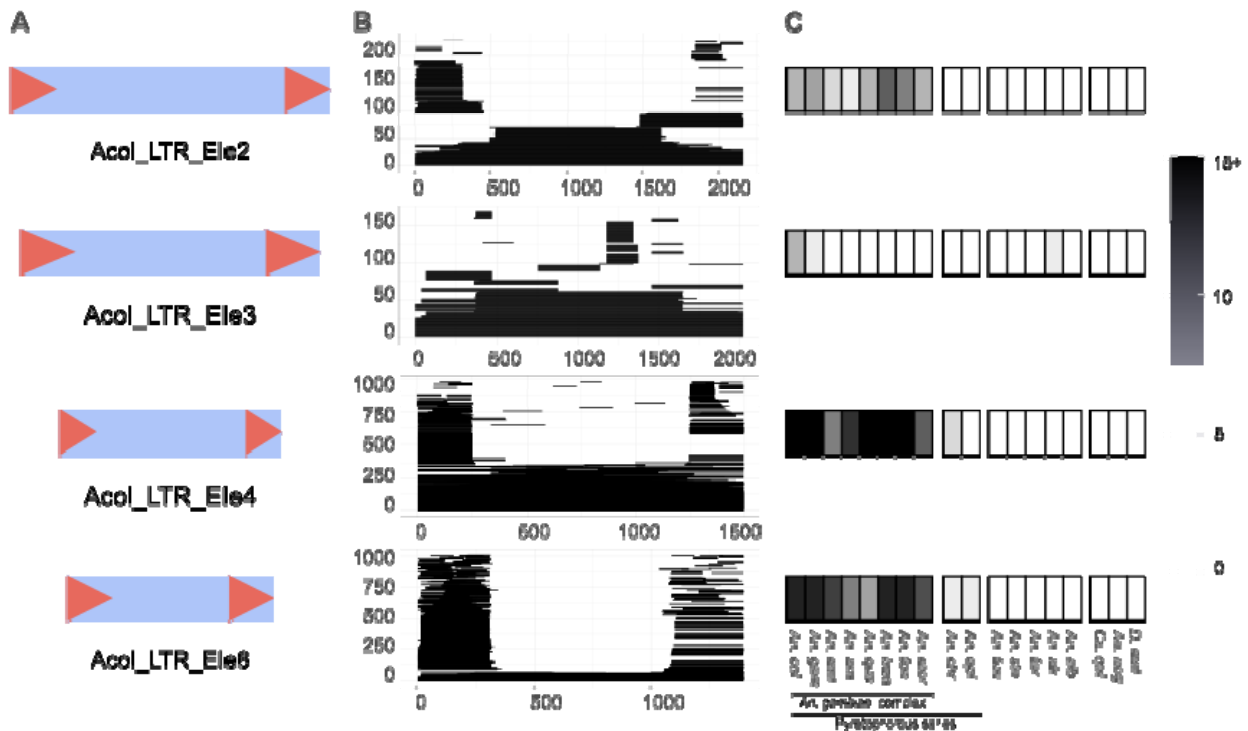

1209

1210

1211 **Figure 3. Differences in TE content between the seven *An. coluzzii* genomes.**

1212 Differences are shown at the (A) order and (B) superfamily levels.  $\chi^2$  tests were performed for  
 1213 the number of insertions and the Person's residuals are shown. Note that MITEs are divided into  
 1214 the m3bp, m4bp, m8bp and mTA superfamilies.

1215

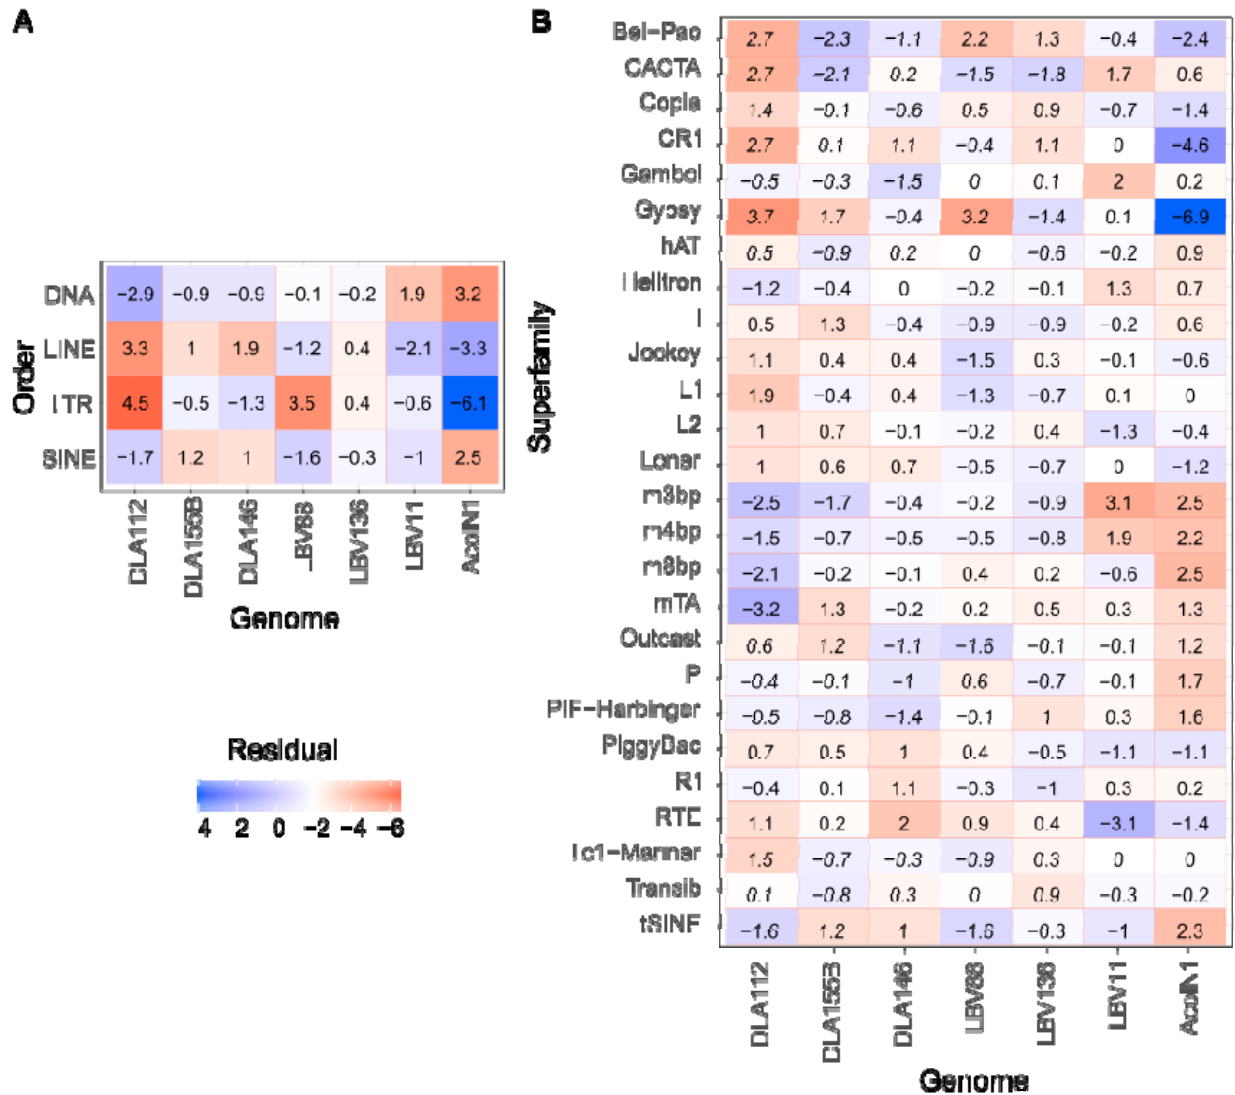

1216

1217



1218 **Figure 4. TE insertions distribution throughout the genomes.**

1219 A) Percentage of euchromatin and heterochromatin occupied by TEs in each of the seven  
1220 analyzed genomes. Each order is shown in a different color. B) Boxplots of the percentage of the  
1221 euchromatin of each chromosome covered by TEs. Autosomes are shown in blue and the X  
1222 chromosome in red. C) Percentage of TE insertions in each genome that fall in a specific  
1223 genomic region. A red line is used to display the expected percentage that should be covered by  
1224 TEs taking in consideration the size of the genomic region. Each order is shown in a different  
1225 color as in A).

1226

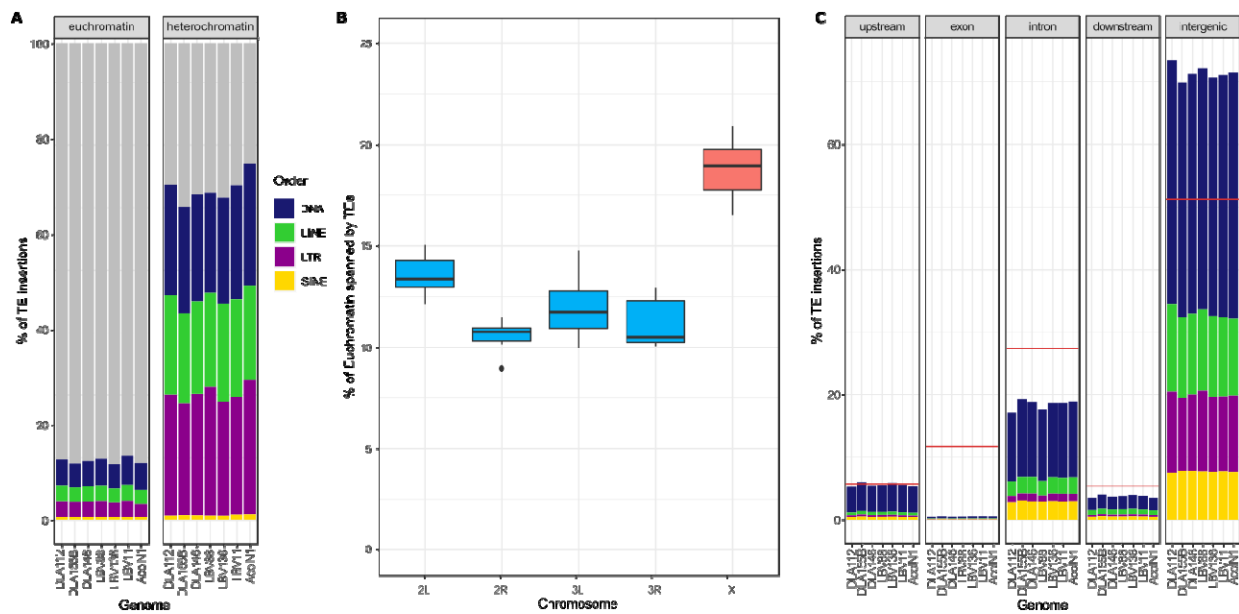

1227

1228

1229

1230

1231

1232 **Figure 5. TE insertions near known inversion breakpoints.**

1233 Diagram of the chromosome 2 with the analyzed inversions. For each inversion both  
 1234 breakpoints, proximal (closer to the centromere) and distal (farther from the centromere), plus  
 1235 2.5 kb to each side are shown. When the position of a breakpoint was not identified at the single  
 1236 base pair level, the interval where the breakpoint is predicted to be is shown in a grey box. Genes  
 1237 are shown as blue boxes while TEs are shown as pink boxes. Below each TE, the family of the  
 1238 TE is shown and below the family name the number of genomes where the insertion was found  
 1239 and the number of genomes where the breakpoint region was identified. Note that breakpoints  
 1240 are shared among some of the inversions.  
 1241

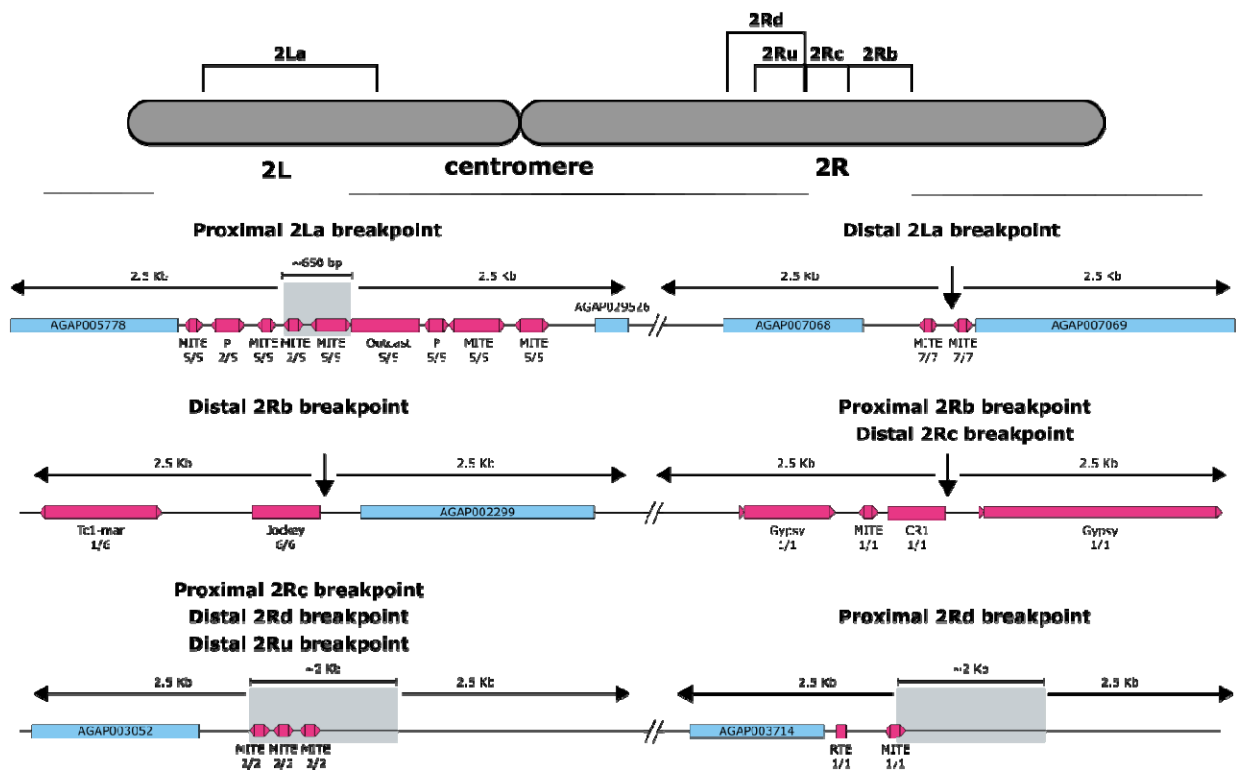

1242

1243

1244 **Figure 6. TE insertions in the neighborhood of genes involved in insecticide resistance.**

1245 The gene structure is shown in black with arrows representing the exons. TE insertions are  
1246 depicted as red boxes. When containing a TFBS for *cnc* or a promoter they are filled in red,  
1247 otherwise they are empty. The red color is darker on fixed TEs and lighter on polymorphic TEs.  
1248 Promoters are shown as arrows while *cnc* binding sites are shown in blue. Resistance alleles are  
1249 shown for *para* (*kdr*).

1250

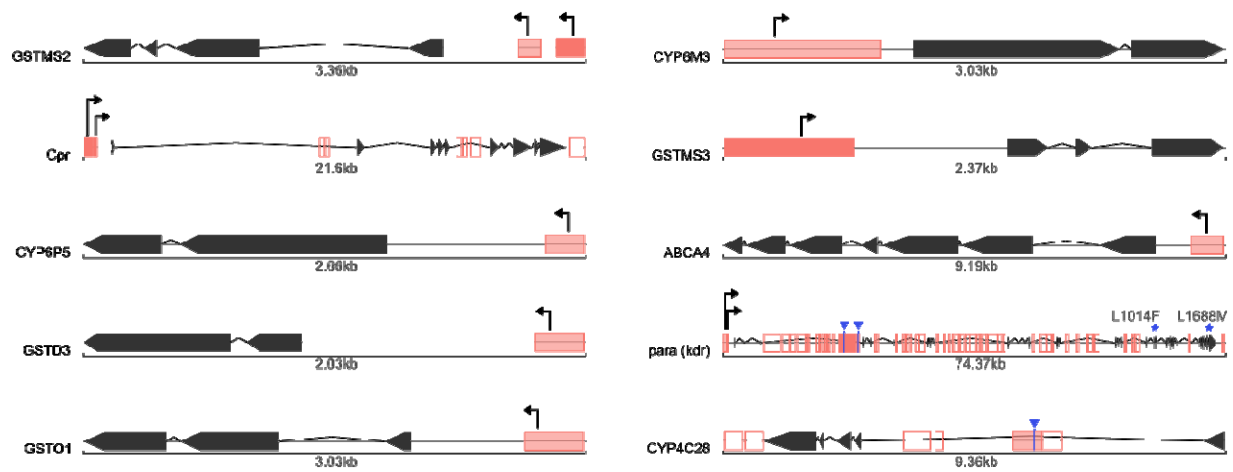

1251

1252

1253

1254

1255

1256

1257

1258

1259

1260

1261 **ADDITIONAL FILES**

1262

1263 File name: Additional file 1

1264 File format: Microsoft Excel Binary File format (xls)

1265 Title of data: Supplementary Tables

1266 Description of data: Supplementary Tables

1267

1268 File name: Additional file 2

1269 File format: Portable document format (pdf)

1270 Title of data: Figure S1. Novel TE families

1271 Description of data: Newly described families. A) The structure of each new family is displayed:

1272 the light blue box represents the full extension of the TE and the red arrows represent LTRs. B)

1273 All insertions for each TE family are shown as a coverage plot where each line represents a copy

1274 in a genome. C) Phylogenetic distribution of the TE family insertions in 15 members of the

1275 *Anopheles* genus, *Culex quinquefasciatus*, *Ae. Aegypti* and *D. melanogaster*. The number of

1276 insertions with more than 80% identity and spanning at least 80% of the consensus, in each

1277 species is shown using a black and white gradient. Species with no insertions are shown in white

1278 while species with 50 or more insertions are shown in black.

1279

1280 File name: Additional file 3

1281 File format: Portable document format (pdf)

1282 Title of data: Figure S2. Number of TE insertions vs genome size

1283 Description of data: Comparison of the bases spanned by TEs in each genome with their full  
1284 genome sizes.

1285

1286 File name: Additional file 4

1287 File format: Portable document format (pdf)

1288 Title of data: Figure S3. TE landscapes

1289 Description of data: TE landscapes for the six genomes sequenced in this work generated using  
1290 dnaPipeTE

1291

1292 File name: Additional file 5

1293 File format: Portable document format (pdf)

1294 Title of data: Figure S4. Genes with TE insertions from active families

1295 Description of data: Diagrams of TE insertions closer than 1 kb to genes showing the gene  
1296 structure and the TE insertion

1297

1298 File name: Additional file 6

1299 File format: Portable document format (pdf)

1300 Title of data: Figure S5. Genes associated with insecticide resistance with TE insertions

1301 Description of data: Diagrams of genes associated with insecticide resistance showing the gene  
1302 structure and the TE insertions closer than 1 kb to gene.

1303
